# Supplementary material
Source: HighWire-hosted journal article supplement (https://bmjopen.bmj.com/content/11/12/e052717)
Supplement: inline-supplementary-material-4 [file inline-supplementary-material-4.pdf]

# OxWell VARIABLE GUIDE 2021

## Questionnaire: FE (Years 12-13)

For the most up-to-date versions, please see <https://osf.io/sekhr/>

### Contents

#### Variable Guide Table of Contents

|                                            |    |
|--------------------------------------------|----|
| <b>DEMOGRAPHICS</b> .....                  | 3  |
| <b>DIET AND FOOD POVERTY</b> .....         | 4  |
| <b>SLEEP</b> .....                         | 5  |
| <b>EXERCISE</b> .....                      | 8  |
| <b>SUBSTANCE USE</b> .....                 | 11 |
| <b>GAMBLING</b> .....                      | 15 |
| <b>DOMESTIC ABUSE</b> .....                | 16 |
| <b>SCHOOL EXPERIENCE</b> .....             | 18 |
| <b>SAFETY</b> .....                        | 24 |
| <b>INTERNET</b> .....                      | 26 |
| <b>GAMING</b> .....                        | 28 |
| <b>COVID</b> .....                         | 29 |
| <b>BULLYING</b> .....                      | 31 |
| <b>SELF-HARM</b> .....                     | 32 |
| <b>MENTAL HEALTH</b> .....                 | 42 |
| <b>ADVERSE CHILDHOOD EXPERIENCES</b> ..... | 48 |
| <b>MENTAL HEALTH SERVICES</b> .....        | 49 |
| <b>RELATIONSHIPS</b> .....                 | 57 |
| <b>SEXUAL HEALTH</b> .....                 | 58 |
| <b>RESEARCH</b> .....                      | 60 |
| <b>PARANOIA</b> .....                      | 61 |

## OxWell 2021 FE

Note: A \* in the *Matched* or *Year Included* columns indicates that the *Question* or *Label* column contain differences in the \* indicated year or survey version

OxWell 2021 FE

**DEMOGRAPHICS**

| CODE | Contingent | Question                                         | Label                                                                                                                                                                                                                                                                                                                                                                             | Value                                                                                        | Type    | Matched            | Year Included        |
|------|------------|--------------------------------------------------|-----------------------------------------------------------------------------------------------------------------------------------------------------------------------------------------------------------------------------------------------------------------------------------------------------------------------------------------------------------------------------------|----------------------------------------------------------------------------------------------|---------|--------------------|----------------------|
|      |            | <b>Please enter your Year Group</b>              | <i>Year group</i>                                                                                                                                                                                                                                                                                                                                                                 | 8 - 11                                                                                       | Numeric | Prim; Sec;<br>FE   | 2019, 2020,<br>2021  |
|      |            | <b>Are you male or female?</b>                   | <i>Male</i><br><i>Female</i><br><i>Other/ Prefer not to answer</i>                                                                                                                                                                                                                                                                                                                | M<br>F<br>R                                                                                  | String  | Prim;<br>Sec*; FE* | 2019, 2020,<br>2021* |
|      |            | <b>How old are you</b>                           | <i>Age in full years</i>                                                                                                                                                                                                                                                                                                                                                          | 15 – 25+                                                                                     | Numeric | Prim; Sec;<br>FE   | 2019, 2020,<br>2021  |
|      |            | <b>Who do you live with?</b>                     | <i>I live with both of my parents</i><br><i>I live with one of my parents</i><br><i>My parents are separated and I live in two homes</i><br><i>I live with other relatives or adoptive parents</i><br><i>I live with other people (foster carers, foster home, childrens home)</i><br><i>I live in more than one place</i><br><i>I live somewhere else I would rather not say</i> | PARENTS<br>PARENT<br>SEPARATED<br>PARENT<br>RELATIVE<br>OTHERHOM<br>E<br>MANY<br>OTHER<br>RF | String  | Prim; Sec;<br>FE   | 2019*;<br>2020;2021  |
|      |            | <b>Is your home rented?</b>                      | <i>Yes</i><br><i>No</i><br><i>Don't know</i>                                                                                                                                                                                                                                                                                                                                      | Y<br>N<br>R                                                                                  | String  | Prim; Sec;<br>FE   | 2021                 |
|      |            | <b>Were you born in the UK</b>                   | <i>Yes</i><br><i>No</i><br><i>Would rather not say</i>                                                                                                                                                                                                                                                                                                                            | Y<br>N<br>R                                                                                  | String  | Prim; Sec;<br>FE   | 2019*;2020;<br>2021  |
|      |            | <b>Were both of your parents born in the UK?</b> | <i>Yes</i><br><i>No</i><br><i>Would rather not say</i>                                                                                                                                                                                                                                                                                                                            | Y<br>N<br>R                                                                                  | String  | Prim; Sec;<br>FE   | 2019*;2020;<br>2021  |

Note: A \* in the Matched or Year Included columns indicates that the Question or Label column contain differences in the \* indicated year or survey version

OxWell 2021 FE

**DIET AND FOOD POVERTY**

| CODE | Contingent | Question                                                                                                                                   | Label                | Value     | Type          | Matched          | Year Included       |
|------|------------|--------------------------------------------------------------------------------------------------------------------------------------------|----------------------|-----------|---------------|------------------|---------------------|
|      |            | <b><i>Do you usually eat breakfast?</i></b>                                                                                                | <i>Never</i>         | 0-12.5    | Sliding scale | Prim; Sec;<br>FE | 2019; 2020;<br>2021 |
|      |            |                                                                                                                                            | <i>Not often</i>     | 12.6-37.5 |               |                  |                     |
|      |            |                                                                                                                                            | <i>Sometimes</i>     | 37.6-62.4 |               |                  |                     |
|      |            |                                                                                                                                            | <i>Usually</i>       | 62.5-87.4 |               |                  |                     |
|      |            |                                                                                                                                            | <i>Every morning</i> | 87.5-100  |               |                  |                     |
|      |            | <b><i>Some young people go to school or to bed hungry because there is not enough food at home. How often does this happen to you?</i></b> | <i>Not at all</i>    | 0-12.5    | Sliding scale | Prim; Sec;<br>FE | 2019; 2020;<br>2021 |
|      |            |                                                                                                                                            | <i>Once or twice</i> | 12.6-37.5 |               |                  |                     |
|      |            |                                                                                                                                            | <i>Sometimes</i>     | 37.6-62.4 |               |                  |                     |
|      |            |                                                                                                                                            | <i>Most days</i>     | 62.5-87.4 |               |                  |                     |
|      |            |                                                                                                                                            | <i>Every day</i>     | 87.5-100  |               |                  |                     |

Note: A \* in the *Matched* or *Year Included* columns indicates that the *Question* or *Label* column contain differences in the \* indicated year or survey version

## OxWell 2021 FE

**SLEEP**

| CODE | Contingent | Question                                                                      | Label                              | Value     | Type          | Matched          | Year Included |
|------|------------|-------------------------------------------------------------------------------|------------------------------------|-----------|---------------|------------------|---------------|
|      |            | <b>How long do you usually take to fall asleep?</b>                           | <i>0 mins</i>                      | 0-12.5    | Sliding scale | Prim; Sec;<br>FE | 2021          |
|      |            |                                                                               | <i>30 mins (half an hour)</i>      | 12.6-37.5 |               |                  |               |
|      |            |                                                                               | <i>60 mins (1 hour)</i>            | 37.6-62.4 |               |                  |               |
|      |            |                                                                               | <i>90 mins (1.5 hours)</i>         | 62.5-87.4 |               |                  |               |
|      |            |                                                                               | <i>120+ mins (2 hours or more)</i> | 87.5-100  |               |                  |               |
|      |            | <b>What time do you usually go to bed on a school/college night?</b>          | <i>6pm</i>                         | 0-12.5    | Sliding scale | Prim; Sec;<br>FE | 2021          |
|      |            |                                                                               | <i>8pm</i>                         | 12.6-37.5 |               |                  |               |
|      |            |                                                                               | <i>10pm</i>                        | 37.6-62.4 |               |                  |               |
|      |            |                                                                               | <i>12 midnight</i>                 | 62.5-87.4 |               |                  |               |
|      |            |                                                                               | <i>2am or later</i>                | 87.5-100  |               |                  |               |
|      |            | <b>What time do you usually try to fall asleep on a school/college night?</b> | <i>6pm</i>                         | 0-12.5    | Sliding scale | Prim; Sec;<br>FE | 2021          |
|      |            |                                                                               | <i>8pm</i>                         | 12.6-37.5 |               |                  |               |
|      |            |                                                                               | <i>10pm</i>                        | 37.6-62.4 |               |                  |               |
|      |            |                                                                               | <i>12 midnight</i>                 | 62.5-87.4 |               |                  |               |
|      |            |                                                                               | <i>2am or later</i>                | 87.5-100  |               |                  |               |
|      |            | <b>What time do you usually wake up on a school/college day?</b>              | <i>5am</i>                         | 0-12.5    | Sliding scale | Prim; Sec;<br>FE | 2021          |
|      |            |                                                                               | <i>7am</i>                         | 12.6-37.5 |               |                  |               |
|      |            |                                                                               | <i>9am</i>                         | 37.6-62.4 |               |                  |               |
|      |            |                                                                               | <i>11am</i>                        | 62.5-87.4 |               |                  |               |
|      |            |                                                                               | <i>1pm or later</i>                | 87.5-100  |               |                  |               |
|      |            | <b>What time do you usually go to bed at the weekend?</b>                     | <i>6pm</i>                         | 0-12.5    | Sliding scale | Prim; Sec;<br>FE | 2021          |
|      |            |                                                                               | <i>8pm</i>                         | 12.6-37.5 |               |                  |               |
|      |            |                                                                               | <i>10pm</i>                        | 37.6-62.4 |               |                  |               |
|      |            |                                                                               | <i>12 midnight</i>                 | 62.5-87.4 |               |                  |               |
|      |            |                                                                               | <i>2am or later</i>                | 87.5-100  |               |                  |               |
|      |            | <b>What time do you usually try to fall asleep at the weekend?</b>            | <i>6pm</i>                         | 0-12.5    | Sliding scale | Prim; Sec;<br>FE | 2021          |
|      |            |                                                                               | <i>8pm</i>                         | 12.6-37.5 |               |                  |               |
|      |            |                                                                               | <i>10pm</i>                        | 37.6-62.4 |               |                  |               |
|      |            |                                                                               | <i>12 midnight</i>                 | 62.5-87.4 |               |                  |               |
|      |            |                                                                               | <i>2am or later</i>                | 87.5-100  |               |                  |               |
|      |            | <b>What time do you usually wake up at the weekend?</b>                       | <i>5am</i>                         | 0-12.5    | Sliding scale | Prim; Sec;<br>FE | 2021          |
|      |            |                                                                               | <i>7am</i>                         | 12.6-37.5 |               |                  |               |

Note: A \* in the Matched or Year Included columns indicates that the Question or Label column contain differences in the \* indicated year or survey version

## OxWell 2021 FE

|  |                                                                                                                                                                                                                |                                           |           |               |               |      |
|--|----------------------------------------------------------------------------------------------------------------------------------------------------------------------------------------------------------------|-------------------------------------------|-----------|---------------|---------------|------|
|  |                                                                                                                                                                                                                | 9am                                       | 37.6-62.4 |               |               |      |
|  |                                                                                                                                                                                                                | 11am                                      | 62.5-87.4 |               |               |      |
|  |                                                                                                                                                                                                                | 1pm or later                              | 87.5-100  |               |               |      |
|  | <b>People sometimes feel sleepy during the daytime. During your daytime activities, how much of a problem do you have with sleepiness (feeling sleepy, struggling to stay awake)?</b>                          | No problem at all                         | 0-12.5    | Sliding scale | Prim; Sec; FE | 2021 |
|  |                                                                                                                                                                                                                | A little problem                          | 12.6-37.5 |               |               |      |
|  |                                                                                                                                                                                                                | More than a little problem                | 37.6-62.4 |               |               |      |
|  |                                                                                                                                                                                                                | A big problem                             | 62.5-87.4 |               |               |      |
|  |                                                                                                                                                                                                                | A very big problem                        | 87.5-100  |               |               |      |
|  | <b>Thinking about the past month, to what extent has poor sleep troubled you in general?</b>                                                                                                                   | Not at all                                | NOTATALL  | String        | Prim; Sec; FE | 2021 |
|  |                                                                                                                                                                                                                | A little                                  | LITTLE    |               |               |      |
|  |                                                                                                                                                                                                                | Somewhat                                  | SOMEWHAT  |               |               |      |
|  |                                                                                                                                                                                                                | Much                                      | MUCH      |               |               |      |
|  |                                                                                                                                                                                                                | Very much                                 | VERYMUCH  |               |               |      |
|  | <b>Thinking about a typical night in the last month, how many nights a week do you have a problem with your sleep?</b>                                                                                         | 0-1                                       | 0TO1      | String        | Prim; Sec; FE | 2021 |
|  |                                                                                                                                                                                                                | 2                                         | 2         |               |               |      |
|  |                                                                                                                                                                                                                | 3                                         | 3         |               |               |      |
|  |                                                                                                                                                                                                                | 4                                         | 4         |               |               |      |
|  |                                                                                                                                                                                                                | 5-7                                       | 5TO7      |               |               |      |
|  | <b>On a school/college night (when you have lessons the next day), who usually sets your bedtime?</b>                                                                                                          | Yourself                                  | SELF      | String        | Prim; Sec; FE | 2021 |
|  |                                                                                                                                                                                                                | Parent/carer/guardian/other family member | CARER     |               |               |      |
|  |                                                                                                                                                                                                                | other                                     | ##        |               |               |      |
|  |                                                                                                                                                                                                                |                                           | OTHER     |               |               |      |
|  | <b>On a weekend night (no lessons the next day), who usually sets your bedtime?</b>                                                                                                                            | Yourself                                  | SELF      | String        | Prim; Sec; FE | 2021 |
|  |                                                                                                                                                                                                                | Parent/carer/guardian/other family member | CARER     |               |               |      |
|  |                                                                                                                                                                                                                | other                                     | ##        |               |               |      |
|  |                                                                                                                                                                                                                |                                           | OTHER     |               |               |      |
|  | <b>On school/college nights (when you have lessons the next day), do you have a rule or set time in your house about when you are supposed to turn off or put away computers, phones or other electronics?</b> | Yes                                       | Y         | String        | Prim; Sec; FE | 2021 |
|  |                                                                                                                                                                                                                | No                                        | N         |               |               |      |
|  | <b>How often do you use social media (e.g. tik-tok, instagram) in the hour before you intend to go to sleep?</b>                                                                                               | Never                                     | 0-12.5    | Sliding scale | Prim; Sec; FE | 2021 |
|  |                                                                                                                                                                                                                | Rarely (1-2 times a month)                | 12.6-37.5 |               |               |      |
|  |                                                                                                                                                                                                                | Sometimes (1-2 times a week)              | 37.6-62.4 |               |               |      |
|  |                                                                                                                                                                                                                | Often (3-4 times a week)                  | 62.5-87.4 |               |               |      |

Note: A \* in the Matched or Year Included columns indicates that the Question or Label column contain differences in the \* indicated year or survey version

## OxWell 2021 FE

|  |                                                                                                                                                                                      | Daily                        | 87.5-100  |               |                  |      |
|--|--------------------------------------------------------------------------------------------------------------------------------------------------------------------------------------|------------------------------|-----------|---------------|------------------|------|
|  | <b>How often do you play video games in the hour before you intend to go to sleep (including games on consoles, computer, tablet, mobile phone or other portable gaming device)?</b> | Never                        | 0-12.5    | Sliding scale | Prim; Sec;<br>FE | 2021 |
|  |                                                                                                                                                                                      | Rarely (1-2 times a month)   | 12.6-37.5 |               |                  |      |
|  |                                                                                                                                                                                      | Sometimes (1-2 times a week) | 37.6-62.4 |               |                  |      |
|  |                                                                                                                                                                                      | Often (3-4 times a week)     | 62.5-87.4 |               |                  |      |
|  |                                                                                                                                                                                      | Daily                        | 87.5-100  |               |                  |      |

Note: A \* in the *Matched* or *Year Included* columns indicates that the *Question* or *Label* column contain differences in the \* indicated year or survey version

## OxWell 2021 FE

**EXERCISE**

| CODE | Contingent | Question                                                                                                                               | Label                   | Value     | Type          | Matched          | Year Included |
|------|------------|----------------------------------------------------------------------------------------------------------------------------------------|-------------------------|-----------|---------------|------------------|---------------|
|      |            | <b>About how many hours physical activity or exercise do you do over a whole week (in and out of school/college, during term-time)</b> | <i>1 hour or less)</i>  | 0-12.5    | Sliding scale | Prim; Sec;<br>FE | 2020; 2021*   |
|      |            |                                                                                                                                        | <i>3 hours</i>          | 12.6-37.5 |               |                  |               |
|      |            |                                                                                                                                        | <i>6 hours</i>          | 37.6-62.4 |               |                  |               |
|      |            |                                                                                                                                        | <i>9 hours</i>          | 62.5-87.4 |               |                  |               |
|      |            |                                                                                                                                        | <i>12 hours or more</i> | 87.5-100  |               |                  |               |
|      |            | <b>How many times per week do you normally do PE/sports during school/college time?</b>                                                | <i>0</i>                | 0-12.5    | Sliding scale | Prim; Sec;<br>FE | 2021          |
|      |            |                                                                                                                                        | <i>3</i>                | 12.6-37.5 |               |                  |               |
|      |            |                                                                                                                                        | <i>6</i>                | 37.6-62.4 |               |                  |               |
|      |            |                                                                                                                                        | <i>9</i>                | 62.5-87.4 |               |                  |               |
|      |            |                                                                                                                                        | <i>12 or more</i>       | 87.5-100  |               |                  |               |
|      |            | <b>How many times per week do you do sports or exercise outside of school/college hours?</b>                                           | <i>0</i>                | 0-12.5    | Sliding scale | Prim; Sec;<br>FE | 2021          |
|      |            |                                                                                                                                        | <i>3</i>                | 12.6-37.5 |               |                  |               |
|      |            |                                                                                                                                        | <i>6</i>                | 37.6-62.4 |               |                  |               |
|      |            |                                                                                                                                        | <i>9</i>                | 62.5-87.4 |               |                  |               |
|      |            |                                                                                                                                        | <i>12 or more</i>       | 87.5-100  |               |                  |               |
|      |            | <b>Is most of your exercise at school/college or outside of school/college?</b>                                                        | <i>Only at</i>          | 0-12.5    | Sliding scale | Prim; Sec;<br>FE | 2021          |
|      |            |                                                                                                                                        | <i>Mostly at</i>        | 12.6-37.5 |               |                  |               |
|      |            |                                                                                                                                        | <i>Same in/out of</i>   | 37.6-62.4 |               |                  |               |
|      |            |                                                                                                                                        | <i>Mostly outside</i>   | 62.5-87.4 |               |                  |               |
|      |            |                                                                                                                                        | <i>All outside</i>      | 87.5-100  |               |                  |               |
|      |            | <b>Compared to before the first lockdown, how much time do you spend doing sports or exercise now?</b>                                 | <i>Much less</i>        | 0-12.5    | Sliding scale | Prim; Sec;<br>FE | 2021          |
|      |            |                                                                                                                                        | <i>Slightly less</i>    | 12.6-37.5 |               |                  |               |
|      |            |                                                                                                                                        | <i>The same amount</i>  | 37.6-62.4 |               |                  |               |
|      |            |                                                                                                                                        | <i>Slightly more</i>    | 62.5-87.4 |               |                  |               |
|      |            |                                                                                                                                        | <i>Much more</i>        | 87.5-100  |               |                  |               |
|      |            | <b>How much do you enjoy physical exercise outside of school/college time?</b>                                                         | <i>Never</i>            | 0-12.5    | Sliding scale | Prim; Sec;<br>FE | 2021          |
|      |            |                                                                                                                                        | <i>Not often</i>        | 12.6-37.5 |               |                  |               |
|      |            |                                                                                                                                        | <i>Sometimes</i>        | 37.6-62.4 |               |                  |               |
|      |            |                                                                                                                                        | <i>Quite often</i>      | 62.5-87.4 |               |                  |               |
|      |            |                                                                                                                                        | <i>Always</i>           | 87.5-100  |               |                  |               |
|      |            | <b>Would you like to do more sports/exercise?</b>                                                                                      | <i>Yes</i>              | Y         | String        | Prim; Sec;<br>FE | 2020; 2021    |
|      |            |                                                                                                                                        | <i>No</i>               | N         |               |                  |               |

Note: A \* in the Matched or Year Included columns indicates that the Question or Label column contain differences in the \* indicated year or survey version



## OxWell 2021 FE

|  |                                                                                           |                      |           |               |               |                  |
|--|-------------------------------------------------------------------------------------------|----------------------|-----------|---------------|---------------|------------------|
|  | <b>How much do you normally enjoy your PE lessons?</b>                                    | Never                | 0-12.5    | String        | Prim; Sec; FE | 2020; 2021       |
|  |                                                                                           | Not often            | 12.6-37.5 |               |               |                  |
|  |                                                                                           | Sometimes            | 37.6-62.4 |               |               |                  |
|  |                                                                                           | Quite often          | 62.5-87.4 |               |               |                  |
|  |                                                                                           | Always               | 87.5-100  |               |               |                  |
|  | <b>How important are the following in your decision to do sport or physical activity:</b> |                      |           |               |               |                  |
|  | <b>Spend time with friends and meet new people</b>                                        | Not at all important | 0-12.5    | Sliding scale | Prim; Sec; FE | 2019; 2021       |
|  |                                                                                           | Not very important   | 12.6-37.5 |               |               |                  |
|  |                                                                                           | Quite important      | 37.6-62.4 |               |               |                  |
|  |                                                                                           | Important            | 62.5-87.4 |               |               |                  |
|  |                                                                                           | Very important       | 87.5-100  |               |               |                  |
|  | <b>Exercise get fit</b>                                                                   | Not at all important | 0-12.5    | Sliding scale | Prim; Sec; FE | 2019; 2020; 2021 |
|  |                                                                                           | Not very important   | 12.6-37.5 |               |               |                  |
|  |                                                                                           | Quite important      | 37.6-62.4 |               |               |                  |
|  |                                                                                           | Important            | 62.5-87.4 |               |               |                  |
|  |                                                                                           | Very important       | 87.5-100  |               |               |                  |
|  | <b>Unwind/reduce stress</b>                                                               | Not at all important | 0-12.5    | Sliding scale | Prim; Sec; FE | 2019; 2020; 2021 |
|  |                                                                                           | Not very important   | 12.6-37.5 |               |               |                  |
|  |                                                                                           | Quite important      | 37.6-62.4 |               |               |                  |
|  |                                                                                           | Important            | 62.5-87.4 |               |               |                  |
|  |                                                                                           | Very important       | 87.5-100  |               |               |                  |
|  | <b>Weight management/body shaping</b>                                                     | Not at all important | 0-12.5    | Sliding scale | Prim; Sec; FE | 2019; 2020; 2021 |
|  |                                                                                           | Not very important   | 12.6-37.5 |               |               |                  |
|  |                                                                                           | Quite important      | 37.6-62.4 |               |               |                  |
|  |                                                                                           | Important            | 62.5-87.4 |               |               |                  |
|  |                                                                                           | Very important       | 87.5-100  |               |               |                  |
|  | <b>Learn a new skill</b>                                                                  | Not at all important | 0-12.5    | Sliding scale | Prim; Sec; FE | 2019; 2020; 2021 |
|  |                                                                                           | Not very important   | 12.6-37.5 |               |               |                  |
|  |                                                                                           | Quite important      | 37.6-62.4 |               |               |                  |
|  |                                                                                           | Important            | 62.5-87.4 |               |               |                  |
|  |                                                                                           | Very important       | 87.5-100  |               |               |                  |
|  | <b>Improve performance/do well competitively</b>                                          | Not at all important | 0-12.5    | Sliding scale | Prim; Sec; FE | 2019; 2020; 2021 |
|  |                                                                                           | Not very important   | 12.6-37.5 |               |               |                  |
|  |                                                                                           | Quite important      | 37.6-62.4 |               |               |                  |
|  |                                                                                           | Important            | 62.5-87.4 |               |               |                  |
|  |                                                                                           | Very important       | 87.5-100  |               |               |                  |
|  | <b>Enjoyment - feeling good physically/mentally</b>                                       | Not at all important | 0-12.5    | Sliding scale | Prim; Sec; FE | 2019; 2020; 2021 |
|  |                                                                                           | Not very important   | 12.6-37.5 |               |               |                  |
|  |                                                                                           | Quite important      | 37.6-62.4 |               |               |                  |
|  |                                                                                           | Important            | 62.5-87.4 |               |               |                  |

Note: A \* in the Matched or Year Included columns indicates that the Question or Label column contain differences in the \* indicated year or survey version

## OxWell 2021 FE

|  |                                                                     |                             |           |               |                  |                     |
|--|---------------------------------------------------------------------|-----------------------------|-----------|---------------|------------------|---------------------|
|  | <b><i>Have to do it for others - school/college/team/family</i></b> | <i>Very important</i>       | 87.5-100  | Sliding scale | Prim; Sec;<br>FE | 2019; 2020;<br>2021 |
|  |                                                                     | <i>Not at all important</i> | 0-12.5    |               |                  |                     |
|  |                                                                     | <i>Not very important</i>   | 12.6-37.5 |               |                  |                     |
|  |                                                                     | <i>Quite important</i>      | 37.6-62.4 |               |                  |                     |
|  |                                                                     | <i>Important</i>            | 62.5-87.4 |               |                  |                     |
|  |                                                                     | <i>Very important</i>       | 87.5-100  |               |                  |                     |

Note: A \* in the *Matched* or *Year Included* columns indicates that the *Question* or *Label* column contain differences in the \* indicated year or survey version

OxWell 2021 FE

**SUBSTANCE USE**

| CODE | Contingent | Question                                                                | Label                                      | Value      | Type          | Matched  | Year Included |
|------|------------|-------------------------------------------------------------------------|--------------------------------------------|------------|---------------|----------|---------------|
|      |            | <b>Do you smoke cigarettes (i.e. tobacco, NOT vaping/e-cigarettes)?</b> | <i>Never</i>                               | 0-12.5     | Sliding scale | Sec*; FE | 2019; 2020*   |
|      |            |                                                                         | <i>Not often (once or twice)</i>           | 12.6-37.5  |               |          |               |
|      |            |                                                                         | <i>Sometimes (monthly)</i>                 | 37.6-62.4  |               |          |               |
|      |            |                                                                         | <i>Quite often (weekly)</i>                | 62.5-87.4  |               |          |               |
|      |            |                                                                         | <i>Most days</i>                           | 87.5-100   |               |          |               |
|      |            | <b>Do you use e-cigarettes (vaping)?</b>                                | <i>Never</i>                               | 0-12.5     | Sliding scale | Sec*; FE | 2019; 2020*   |
|      |            |                                                                         | <i>Not often (once or twice)</i>           | 12.6-37.5  |               |          |               |
|      |            |                                                                         | <i>Sometimes (monthly)</i>                 | 37.6-62.4  |               |          |               |
|      |            |                                                                         | <i>Quite often (weekly)</i>                | 62.5-87.4  |               |          |               |
|      |            |                                                                         | <i>Most days</i>                           | 87.5-100   |               |          |               |
|      |            | <b>Have you ever had an alcoholic drink?</b>                            | <i>Never</i>                               | 0-12.5     | Sliding scale | Sec*; FE | 2019; 2020*   |
|      |            |                                                                         | <i>Not often (once or twice)</i>           | 12.6-37.5  |               |          |               |
|      |            |                                                                         | <i>Sometimes (monthly)</i>                 | 37.6-62.4  |               |          |               |
|      |            |                                                                         | <i>Quite often (weekly)</i>                | 62.5-87.4  |               |          |               |
|      |            |                                                                         | <i>Most days</i>                           | 87.5-100   |               |          |               |
|      |            | <b>When did you last have an alcoholic drink?</b>                       | <i>Today</i>                               | TODAY      | String        | Sec; FE  | 2020          |
|      |            |                                                                         | <i>Yesterday</i>                           | YESTERDAY  |               |          |               |
|      |            |                                                                         | <i>Some other time in the last 7 days</i>  | LAST7DAYS  |               |          |               |
|      |            |                                                                         | <i>1 week, but less than 2 weeks ago</i>   | 1TO2WEEKS  |               |          |               |
|      |            |                                                                         | <i>2 weeks, but less than 4 weeks ago</i>  | 2TO4WEEKS  |               |          |               |
|      |            |                                                                         | <i>1 month, but less than 6 months ago</i> | 1TO6MONTHS |               |          |               |
|      |            |                                                                         | <i>6 months ago or more</i>                | GT6MONTHS  |               |          |               |
|      |            | <b>Have you ever been drunk?</b>                                        | <i>Never</i>                               | 0-12.5     | Sliding scale | Sec*; FE | 2019; 2020*   |
|      |            |                                                                         | <i>Once</i>                                | 12.6-37.5  |               |          |               |
|      |            |                                                                         | <i>2-3 times</i>                           | 37.6-62.4  |               |          |               |
|      |            |                                                                         | <i>4-10 times</i>                          | 62.5-87.4  |               |          |               |
|      |            |                                                                         | <i>More than 10 times</i>                  | 87.5-100   |               |          |               |
|      |            | <b>Have you been drunk in the last 7 days?</b>                          | <i>Yes</i>                                 | Y          | String        | Sec; Fe  | 2020          |
|      |            |                                                                         | <i>No</i>                                  | N          |               |          |               |

Note: A \* in the Matched or Year Included columns indicates that the Question or Label column contain differences in the \* indicated year or survey version

## OxWell 2021 FE

|  |                                                                                                                                                                                    |                                                                                                                                                                                               |                                                                         |        |          |              |
|--|------------------------------------------------------------------------------------------------------------------------------------------------------------------------------------|-----------------------------------------------------------------------------------------------------------------------------------------------------------------------------------------------|-------------------------------------------------------------------------|--------|----------|--------------|
|  | <b>When you drink alcohol, where are you USUALLY?</b>                                                                                                                              | At home<br>At someone else's home<br>At a party<br>In a pub or a bar<br>In a club, disco or gig/festival<br>At school<br>Out on the street, in a park or other outdoor area<br>Somewhere else | HOME<br>HOMEELSE<br>PARTY<br>PUB<br>SCHOOL<br>OUTDOOR<br>ELSEWHERE      | String | Sec; FE  | 2020         |
|  | <b>Have you ever been offered something to get you high or drugs not prescribed by your doctor (examples are illegal drugs, legal highs and prescription medication)?</b>          | Yes<br>No                                                                                                                                                                                     | Y<br>N                                                                  | String | Sec*; FE | 2019; 2020*  |
|  | <b>Have you ever taken something to get high or self-medicated with drugs not prescribed by your doctor (examples are illegal drugs, legal highs and prescription medication)?</b> | Never<br>Yes – Once<br>Yes – On more than one occasion                                                                                                                                        | N<br>YONCE<br>YMORE                                                     | String | Sec*; FE | 2019*; 2020* |
|  | <b>The first time you used drugs, how did you get them?</b>                                                                                                                        | From someone I know from school<br>From someone I know who is not from my school<br>From a friend of a friend<br>From a stranger<br>From a website/online/internet                            | SCHOOLFRIEND<br>NOTSCHOOLFRIEND<br>FRIENDSFRIENDS<br>STRANGER<br>ONLINE | String | Sec; FE  | 2020         |
|  | <b>Where were you the first time you used drugs?</b>                                                                                                                               | At home<br>At someone else's home<br>At a party<br>In a pub or a bar<br>In a club, disco or gig/festival<br>At school<br>Out on the street, in a park or other outdoor area<br>Somewhere else | HOME<br>HOMEELSE<br>PARTY<br>PUB<br>SCHOOL<br>OUTDOOR<br>ELSEWHERE      | String | Sec; FE  | 2021         |
|  | <b>Where were you the last time you used drugs?</b>                                                                                                                                | At home<br>At someone else's home                                                                                                                                                             | HOME<br>HOMEELSE                                                        | String | Sec; FE  | 2021         |

Note: A \* in the Matched or Year Included columns indicates that the Question or Label column contain differences in the \* indicated year or survey version

## OxWell 2021 FE

|  |                                                                                                                                                                              |                                                    |               |        |         |      |
|--|------------------------------------------------------------------------------------------------------------------------------------------------------------------------------|----------------------------------------------------|---------------|--------|---------|------|
|  |                                                                                                                                                                              | At a party                                         | PARTY         |        |         |      |
|  |                                                                                                                                                                              | In a pub or a bar In a club, disco or gig/festival | PUB           |        |         |      |
|  |                                                                                                                                                                              | At school                                          | SCHOOL        |        |         |      |
|  |                                                                                                                                                                              | Out on the street, in a park or other outdoor area | OUTDOOR       |        |         |      |
|  |                                                                                                                                                                              | Somewhere else                                     | ELSEWHERE     |        |         |      |
|  | <b>The last time you used drugs, did you use them all yourself or did you sell or give some to someone else?</b>                                                             | I used it all myself                               | SELF          | String | Sec; FE | 2021 |
|  |                                                                                                                                                                              | I sold some of it                                  | SOLDSOME      |        |         |      |
|  |                                                                                                                                                                              | I gave some of it away                             | GIFTED        |        |         |      |
|  |                                                                                                                                                                              | I both gave some away and sold some                | SOLDANDGIFTED |        |         |      |
|  | <b>When was the last time you ever used or took any of the following?</b>                                                                                                    |                                                    |               | String | Sec; FE | 2021 |
|  | <b>Cannabis (weed, resin, skunk, CBD)</b>                                                                                                                                    | In the last months                                 | THISMONTH     |        |         |      |
|  |                                                                                                                                                                              | In the last year                                   | THISYEAR      |        |         |      |
|  |                                                                                                                                                                              | More than a year ago                               | GTYEAR        |        |         |      |
|  |                                                                                                                                                                              | Never                                              | N             |        |         |      |
|  | <b>Nitrous Oxide (NO, NOS, N2O, laughing gas, balloons)</b>                                                                                                                  | In the last months                                 | THISMONTH     |        |         |      |
|  |                                                                                                                                                                              | In the last year                                   | THISYEAR      |        |         |      |
|  |                                                                                                                                                                              | More than a year ago                               | GTYEAR        |        |         |      |
|  |                                                                                                                                                                              | Never                                              | N             |        |         |      |
|  | <b>Ketamine (ket, special K, keta, gummies)</b>                                                                                                                              | In the last months                                 | THISMONTH     |        |         |      |
|  |                                                                                                                                                                              | In the last year                                   | THISYEAR      |        |         |      |
|  |                                                                                                                                                                              | More than a year ago                               | GTYEAR        |        |         |      |
|  |                                                                                                                                                                              | Never                                              | N             |        |         |      |
|  | <b>Ecstasy/MDMA (E, eccies, mandy, molly)</b>                                                                                                                                | In the last months                                 | THISMONTH     |        |         |      |
|  |                                                                                                                                                                              | In the last year                                   | THISYEAR      |        |         |      |
|  |                                                                                                                                                                              | More than a year ago                               | GTYEAR        |        |         |      |
|  |                                                                                                                                                                              | Never                                              | N             |        |         |      |
|  | <b>Benzodiazepines (benzos, vallies, diazepam, xanax, etizolam)</b>                                                                                                          | In the last months                                 | THISMONTH     |        |         |      |
|  |                                                                                                                                                                              | In the last year                                   | THISYEAR      |        |         |      |
|  |                                                                                                                                                                              | More than a year ago                               | GTYEAR        |        |         |      |
|  |                                                                                                                                                                              | Never                                              | N             |        |         |      |
|  | <b>Other (amphetamines like speed, cocaine, mephedrone, legal highs, psychedelics like LSD, acid, magic mushrooms, psilocybin, DMT, 2C, opioids like Fentanyl or Heroin)</b> | In the last months                                 | THISMONTH     |        |         |      |
|  |                                                                                                                                                                              | In the last year                                   | THISYEAR      |        |         |      |
|  |                                                                                                                                                                              | More than a year ago                               | GTYEAR        |        |         |      |
|  |                                                                                                                                                                              | Never                                              | N             |        |         |      |

Note: A \* in the Matched or Year Included columns indicates that the Question or Label column contain differences in the \* indicated year or survey version

## OxWell 2021 FE

|  |                                                                            |                                                                                                                                                                                                                            |                                                           |               |         |            |
|--|----------------------------------------------------------------------------|----------------------------------------------------------------------------------------------------------------------------------------------------------------------------------------------------------------------------|-----------------------------------------------------------|---------------|---------|------------|
|  | <b>How easy would it be for you to get illegal drugs if you wanted to?</b> | Very difficult<br>Difficult<br>Neither difficult nor easy<br>Quite easy<br>Very easy                                                                                                                                       | 0-12.5<br>12.6-37.5<br>37.6-62.4<br>62.5-87.4<br>87.5-100 | Sliding scale | Sec; FE | 2020; 2021 |
|  | <b>Have you ever been encouraged or felt pressured to sell drugs?</b>      | No - I have not been encouraged or pressured<br>Yes - I have been pressured<br>Yes - I have been encouraged                                                                                                                | N<br>YPRESSURE<br>D<br>YENCOURA<br>GED                    | String        | Sec; FE | 2021       |
|  | <b>If you wanted information about drugs, who/where would you go to?</b>   | Teacher<br>Parent(s)/Carer<br>Friend(s)<br>Drug service<br>Search engine (e.g. Google)<br>A specific internet site (Talk to Frank, Know the Score)<br>An internet site, but not one of the ones listed above<br>Don't know | Y<br>Y<br>Y<br>Y<br>Y<br>Y<br>Y<br>Y                      | Tick box      | Sec; FE | 2021       |

Note: A \* in the *Matched* or *Year Included* columns indicates that the *Question* or *Label* column contain differences in the \* indicated year or survey version

## OxWell 2021 FE

**GAMBLING**

| CODE | Contingent | Question                                                         | Label          | Value     | Type          | Matched  | Year Included |
|------|------------|------------------------------------------------------------------|----------------|-----------|---------------|----------|---------------|
|      |            | <b><i>Have you ever tried online gambling?</i></b>               | Yes            | Y         | String        | Sec*; FE | 2020; 2021    |
|      |            |                                                                  | No             | N         |               |          |               |
|      |            | <b><i>Have you ever used real money for online gambling?</i></b> | Never          | 0-12.5    | Sliding scale | Sec*; FE | 2020; 2021    |
|      |            |                                                                  | Once or twice  | 12.6-37.5 |               |          |               |
|      |            |                                                                  | A few times    | 37.6-62.4 |               |          |               |
|      |            |                                                                  | Weekly         | 62.5-87.4 |               |          |               |
|      |            |                                                                  | Daily          | 87.5-100  |               |          |               |
|      |            | <b><i>Do you owe money to someone who isn't family?</i></b>      | No             | 0-12.5    | Sliding scale | Sec*; FE | 2020; 2021    |
|      |            |                                                                  | Yes – a little | 12.6-37.5 |               |          |               |
|      |            |                                                                  | Yes – a lot    | 37.6-62.4 |               |          |               |

Note: A \* in the *Matched* or *Year Included* columns indicates that the *Question* or *Label* column contain differences in the \* indicated year or survey version

OxWell 2021 FE

**DOMESTIC ABUSE**

| CODE | Contingent | Question                                                                                                                                                                 | Label                | Value | Type     | Matched | Year Included |
|------|------------|--------------------------------------------------------------------------------------------------------------------------------------------------------------------------|----------------------|-------|----------|---------|---------------|
|      |            | <b>Physical Abuse: Did a parent or other adult in the household hit, beat, kick or physically try to hurt you in any way?</b>                                            |                      | Y     | Tick box | Sec; FE | 2021          |
|      |            | <b>Yes, it has happened in my life</b>                                                                                                                                   | <i>Once or twice</i> | YONCE | String   | Sec; FE | 2021          |
|      |            |                                                                                                                                                                          | <i>Many times</i>    | YMANY |          |         |               |
|      |            | <b>Yes, it has happened in the past twelve months</b>                                                                                                                    | <i>Once or twice</i> | YONCE | String   | Sec; FE | 2021          |
|      |            |                                                                                                                                                                          | <i>Many times</i>    | YMANY |          |         |               |
|      |            | <b>Emotional abuse: Did a parent or other adult in the household swear at you, insult you, humiliate you, threaten you or make you feel unwanted?</b>                    |                      | Y     | Tick box | Sec; FE | 2021          |
|      |            | <b>Yes, it has happened in my life</b>                                                                                                                                   | <i>Once or twice</i> | YONCE | String   | Sec; FE | 2021          |
|      |            |                                                                                                                                                                          | <i>Many times</i>    | YMANY |          |         |               |
|      |            | <b>Yes, it has happened in the past twelve months</b>                                                                                                                    | <i>Once or twice</i> | YONCE | String   | Sec; FE | 2021          |
|      |            |                                                                                                                                                                          | <i>Many times</i>    | YMANY |          |         |               |
|      |            | <b>Sexual abuse: Did someone at least five years older than you or an adult touch or fondle you or have you touch their body in a sexual way?</b>                        |                      | Y     | Tick box | Sec; FE | 2021          |
|      |            | <b>Yes, it has happened in my life</b>                                                                                                                                   | <i>Once or twice</i> | YONCE | String   | Sec; FE | 2021          |
|      |            |                                                                                                                                                                          | <i>Many times</i>    | YMANY |          |         |               |
|      |            | <b>Yes, it has happened in the past twelve months</b>                                                                                                                    | <i>Once or twice</i> | YONCE | String   | Sec; FE | 2021          |
|      |            |                                                                                                                                                                          | <i>Many times</i>    | YMANY |          |         |               |
|      |            | <b>Physical neglect: Did your parent/caregiver for long periods of time not provide you with enough food or drink, clean clothes, or a clean and warm place to live?</b> |                      | Y     | Tick box | Sec; FE | 2021          |
|      |            | <b>Yes, it has happened in my life</b>                                                                                                                                   | <i>Once or twice</i> | YONCE | String   | Sec; FE | 2021          |
|      |            |                                                                                                                                                                          | <i>Many times</i>    | YMANY |          |         |               |
|      |            | <b>Yes, it has happened in the past twelve months</b>                                                                                                                    | <i>Once or twice</i> | YONCE | String   | Sec; FE | 2021          |
|      |            |                                                                                                                                                                          | <i>Many times</i>    | YMANY |          |         |               |
|      |            | <b>Emotional neglect: Were there times when there was no adult living with you who made you feel loved?</b>                                                              |                      | Y     | Tick box | Sec; FE | 2021          |
|      |            | <b>Yes, it has happened in my life</b>                                                                                                                                   | <i>Once or twice</i> | YONCE | String   | Sec; FE | 2021          |
|      |            |                                                                                                                                                                          | <i>Many times</i>    | YMANY |          |         |               |
|      |            | <b>Yes, it has happened in the past twelve months</b>                                                                                                                    | <i>Once or twice</i> | YONCE | String   | Sec; FE | 2021          |
|      |            |                                                                                                                                                                          | <i>Many times</i>    | YMANY |          |         |               |
|      |            | <b>Witnessing parental violence: Did you see or hear one of your parents/carers being slapped, kicked, punched, beaten or deliberately hurt by a partner or ex</b>       |                      | Y     | Tick box | Sec; FE | 2021          |
|      |            | <b>Yes, it has happened in my life</b>                                                                                                                                   | <i>Once or twice</i> | YONCE | String   | Sec; FE | 2021          |
|      |            |                                                                                                                                                                          | <i>Many times</i>    | YMANY |          |         |               |
|      |            | <b>Yes, it has happened in the past twelve months</b>                                                                                                                    | <i>Once or twice</i> | YONCE | String   | Sec; FE | 2021          |

Note: A \* in the Matched or Year Included columns indicates that the Question or Label column contain differences in the \* indicated year or survey version



## OxWell 2021 FE

|  |                                                                                             |                             |           |               |         |            |
|--|---------------------------------------------------------------------------------------------|-----------------------------|-----------|---------------|---------|------------|
|  |                                                                                             | <i>Many times</i>           | YMANY     |               |         |            |
|  | <b><i>Have you ever been a victim of abuse from a friend/peer/boyfriend/girlfriend?</i></b> | <i>Never</i>                | 0-12.5    | Sliding scale | Sec; FE | 2019; 2021 |
|  |                                                                                             | <i>Not often</i>            | 12.6-37.5 |               |         |            |
|  |                                                                                             | <i>Sometimes</i>            | 37.6-62.4 |               |         |            |
|  |                                                                                             | <i>Quite often</i>          | 62.5-87.4 |               |         |            |
|  |                                                                                             | <i>Most days</i>            | 87.5-100  |               |         |            |
|  | <b><i>Is this abuse still happening?</i></b>                                                | <i>Yes</i>                  | Y         | String        | Sec; FE | 2019; 2021 |
|  |                                                                                             | <i>No</i>                   | N         |               |         |            |
|  | <b><i>How old is he/she?</i></b>                                                            | <i>About the same age</i>   | SAME      | String        | Sec; FE | 2019; 2021 |
|  |                                                                                             | <i>Younger</i>              | YOUNGER   |               |         |            |
|  |                                                                                             | <i>Older</i>                | OLDER     |               |         |            |
|  |                                                                                             | <i>An adult</i>             | ADULT     |               |         |            |
|  |                                                                                             | <i>Would rather not say</i> | R         |               |         |            |

Note: A \* in the *Matched* or *Year Included* columns indicates that the *Question* or *Label* column contain differences in the \* indicated year or survey version

OxWell 2021 FE

**SCHOOL EXPERIENCE**

| CODE | Contingent | Question                                                                                                                    | Label                             | Value                             | Type          | Matched       | Year Included    |            |
|------|------------|-----------------------------------------------------------------------------------------------------------------------------|-----------------------------------|-----------------------------------|---------------|---------------|------------------|------------|
|      |            | <b>How much help and support with learning do you feel that you get at school/college?</b>                                  | <i>No help at all</i>             | 0-12.5                            | Sliding scale | Prim; Sec; FE | 2019; 2020; 2021 |            |
|      |            |                                                                                                                             | <i>Not enough help</i>            | 12.6-37.5                         |               |               |                  |            |
|      |            |                                                                                                                             | <i>Just about enough help</i>     | 37.6-62.4                         |               |               |                  |            |
|      |            |                                                                                                                             | <i>Most of the help I need</i>    | 62.5-87.4                         |               |               |                  |            |
|      |            |                                                                                                                             | <i>All of the help I need</i>     | 87.5-100                          |               |               |                  |            |
|      |            | <b>How much help and support do you feel you get with your homework from the people you live with?</b>                      | <i>No help at all</i>             | 0-12.5                            | Sliding scale | Prim; Sec; FE | 2019; 2020; 2021 |            |
|      |            |                                                                                                                             | <i>Not enough help</i>            | 12.6-37.5                         |               |               |                  |            |
|      |            |                                                                                                                             | <i>Just about enough help</i>     | 37.6-62.4                         |               |               |                  |            |
|      |            |                                                                                                                             | <i>Most of the help I need</i>    | 62.5-87.4                         |               |               |                  |            |
|      |            |                                                                                                                             | <i>All of the help I need</i>     | 87.5-100                          |               |               |                  |            |
|      |            | <b>How would you describe being at your school/college?</b>                                                                 |                                   |                                   |               |               | 2019*; 2021      |            |
|      |            |                                                                                                                             | <b>I enjoy my school/college</b>  | <i>Strongly Disagree</i>          | 0-12.5        | Sliding scale | Prim; Sec; FE    | 2019; 2021 |
|      |            |                                                                                                                             |                                   | <i>Disagree</i>                   | 12.6-37.5     |               |                  |            |
|      |            |                                                                                                                             |                                   | <i>Neither Agree nor disagree</i> | 37.6-62.4     |               |                  |            |
|      |            |                                                                                                                             |                                   | <i>Agree</i>                      | 62.5-87.4     |               |                  |            |
|      |            | <i>Strongly Agree</i>                                                                                                       |                                   | 87.5-100                          |               |               |                  |            |
|      |            | <b>I try my best at school/college</b>                                                                                      | <i>Strongly Disagree</i>          | 0-12.5                            | Sliding scale | Prim; Sec; FE | 2019; 2021       |            |
|      |            |                                                                                                                             | <i>Disagree</i>                   | 12.6-37.5                         |               |               |                  |            |
|      |            |                                                                                                                             | <i>Neither Agree nor disagree</i> | 37.6-62.4                         |               |               |                  |            |
|      |            |                                                                                                                             | <i>Agree</i>                      | 62.5-87.4                         |               |               |                  |            |
|      |            |                                                                                                                             | <i>Strongly Agree</i>             | 87.5-100                          |               |               |                  |            |
|      |            | <b>I learn a lot at school/college</b>                                                                                      | <i>Strongly Disagree</i>          | 0-12.5                            | Sliding scale | Prim; Sec; FE | 2019; 2021       |            |
|      |            |                                                                                                                             | <i>Disagree</i>                   | 12.6-37.5                         |               |               |                  |            |
|      |            |                                                                                                                             | <i>Neither Agree nor disagree</i> | 37.6-62.4                         |               |               |                  |            |
|      |            |                                                                                                                             | <i>Agree</i>                      | 62.5-87.4                         |               |               |                  |            |
|      |            |                                                                                                                             | <i>Strongly Agree</i>             | 87.5-100                          |               |               |                  |            |
|      |            | <b>My school/college is giving me useful skills and knowledge</b>                                                           | <i>Strongly Disagree</i>          | 0-12.5                            | Sliding scale | Prim; Sec; FE | 2019; 2021       |            |
|      |            |                                                                                                                             | <i>Disagree</i>                   | 12.6-37.5                         |               |               |                  |            |
|      |            |                                                                                                                             | <i>Neither Agree nor disagree</i> | 37.6-62.4                         |               |               |                  |            |
|      |            |                                                                                                                             | <i>Agree</i>                      | 62.5-87.4                         |               |               |                  |            |
|      |            |                                                                                                                             | <i>Strongly Agree</i>             | 87.5-100                          |               |               |                  |            |
|      |            | <b>My school/college has lots of activities (like sport and drama) to take part in at lunchtime or after school/college</b> | <i>Strongly Disagree</i>          | 0-12.5                            | Sliding scale | Prim; Sec; FE | 2019; 2021       |            |
|      |            |                                                                                                                             | <i>Disagree</i>                   | 12.6-37.5                         |               |               |                  |            |
|      |            |                                                                                                                             | <i>Neither Agree nor disagree</i> | 37.6-62.4                         |               |               |                  |            |
|      |            |                                                                                                                             | <i>Agree</i>                      | 62.5-87.4                         |               |               |                  |            |

18

Note: A \* in the Matched or Year Included columns indicates that the Question or Label column contain differences in the \* indicated year or survey version

## OxWell 2021 FE

|                                                                                 |                                   |           |               |                 |            |
|---------------------------------------------------------------------------------|-----------------------------------|-----------|---------------|-----------------|------------|
| <b><i>My teacher(s) make my lessons fun and interesting</i></b>                 | <i>Agree</i>                      | 62.5-87.4 | Sliding scale | Prim; Sec; FE*  | 2019; 2021 |
|                                                                                 | <i>Strongly Agree</i>             | 87.5-100  |               |                 |            |
|                                                                                 | <i>Strongly Disagree</i>          | 0-12.5    |               |                 |            |
|                                                                                 | <i>Disagree</i>                   | 12.6-37.5 |               |                 |            |
|                                                                                 | <i>Neither Agree nor disagree</i> | 37.6-62.4 |               |                 |            |
| <b><i>My teacher(s) tell me how I am doing with my work</i></b>                 | <i>Agree</i>                      | 62.5-87.4 | Sliding scale | Prim; Sec; FE*  | 2019; 2021 |
|                                                                                 | <i>Strongly Agree</i>             | 87.5-100  |               |                 |            |
|                                                                                 | <i>Strongly Disagree</i>          | 0-12.5    |               |                 |            |
|                                                                                 | <i>Disagree</i>                   | 12.6-37.5 |               |                 |            |
|                                                                                 | <i>Neither Agree nor disagree</i> | 37.6-62.4 |               |                 |            |
| <b><i>Other students often disrupt my lessons</i></b>                           | <i>Agree</i>                      | 62.5-87.4 | Sliding scale | Prim; Sec; FE * | 2019; 2021 |
|                                                                                 | <i>Strongly Agree</i>             | 87.5-100  |               |                 |            |
|                                                                                 | <i>Strongly Disagree</i>          | 0-12.5    |               |                 |            |
|                                                                                 | <i>Disagree</i>                   | 12.6-37.5 |               |                 |            |
|                                                                                 | <i>Neither Agree nor disagree</i> | 37.6-62.4 |               |                 |            |
| <b><i>I get enough help at school/college with learning</i></b>                 | <i>Agree</i>                      | 62.5-87.4 | Sliding scale | Prim; Sec; FE   | 2019; 2021 |
|                                                                                 | <i>Strongly Agree</i>             | 87.5-100  |               |                 |            |
|                                                                                 | <i>Strongly Disagree</i>          | 0-12.5    |               |                 |            |
|                                                                                 | <i>Disagree</i>                   | 12.6-37.5 |               |                 |            |
|                                                                                 | <i>Neither Agree nor disagree</i> | 37.6-62.4 |               |                 |            |
| <b><i>I get enough help at school/college with emotional/pastoral needs</i></b> | <i>Agree</i>                      | 62.5-87.4 | Sliding scale | Prim; Sec*; FE* | 2019; 2021 |
|                                                                                 | <i>Strongly Agree</i>             | 87.5-100  |               |                 |            |
|                                                                                 | <i>Strongly Disagree</i>          | 0-12.5    |               |                 |            |
|                                                                                 | <i>Disagree</i>                   | 12.6-37.5 |               |                 |            |
|                                                                                 | <i>Neither Agree nor disagree</i> | 37.6-62.4 |               |                 |            |
| <b><i>I feel stressed by school/college work</i></b>                            | <i>Agree</i>                      | 62.5-87.4 | Sliding scale | Prim; Sec; FE   | 2019; 2021 |
|                                                                                 | <i>Strongly Agree</i>             | 87.5-100  |               |                 |            |
|                                                                                 | <i>Strongly Disagree</i>          | 0-12.5    |               |                 |            |
|                                                                                 | <i>Disagree</i>                   | 12.6-37.5 |               |                 |            |
|                                                                                 | <i>Neither Agree nor disagree</i> | 37.6-62.4 |               |                 |            |
| <b><i>I worry about going to school/college</i></b>                             | <i>Agree</i>                      | 62.5-87.4 | Sliding scale | Prim; Sec; FE   | 2019; 2021 |
|                                                                                 | <i>Strongly Agree</i>             | 87.5-100  |               |                 |            |
|                                                                                 | <i>Strongly Disagree</i>          | 0-12.5    |               |                 |            |
|                                                                                 | <i>Disagree</i>                   | 12.6-37.5 |               |                 |            |
|                                                                                 | <i>Neither Agree nor disagree</i> | 37.6-62.4 |               |                 |            |
|                                                                                 | <i>Agree</i>                      | 62.5-87.4 |               |                 |            |
|                                                                                 | <i>Strongly Agree</i>             | 87.5-100  |               |                 |            |

Note: A \* in the *Matched* or *Year Included* columns indicates that the *Question* or *Label* column contain differences in the \* indicated year or survey version

## OxWell 2021 FE

|                                   |                                                                                                         |                                   |           |               |                  |            |
|-----------------------------------|---------------------------------------------------------------------------------------------------------|-----------------------------------|-----------|---------------|------------------|------------|
|                                   | <b><i>I am often in trouble</i></b>                                                                     | <i>Strongly Disagree</i>          | 0-12.5    | Sliding scale | Prim; Sec;<br>FE | 2019; 2021 |
|                                   |                                                                                                         | <i>Disagree</i>                   | 12.6-37.5 |               |                  |            |
|                                   |                                                                                                         | <i>Neither Agree nor disagree</i> | 37.6-62.4 |               |                  |            |
|                                   |                                                                                                         | <i>Agree</i>                      | 62.5-87.4 |               |                  |            |
|                                   | <b><i>I am often aggressive or violent</i></b>                                                          | <i>Strongly Agree</i>             | 87.5-100  | Sliding scale | Prim; Sec;<br>FE | 2019; 2021 |
|                                   |                                                                                                         | <i>Strongly Disagree</i>          | 0-12.5    |               |                  |            |
|                                   |                                                                                                         | <i>Disagree</i>                   | 12.6-37.5 |               |                  |            |
|                                   |                                                                                                         | <i>Neither Agree nor disagree</i> | 37.6-62.4 |               |                  |            |
|                                   | <b><i>I usually achieve top marks at my school/college</i></b>                                          | <i>Agree</i>                      | 62.5-87.4 | Sliding scale | Prim; Sec;<br>FE | 2019; 2021 |
|                                   |                                                                                                         | <i>Strongly Agree</i>             | 87.5-100  |               |                  |            |
|                                   |                                                                                                         | <i>Strongly Disagree</i>          | 0-12.5    |               |                  |            |
|                                   |                                                                                                         | <i>Disagree</i>                   | 12.6-37.5 |               |                  |            |
|                                   | <b><i>I am happy to use the school/college toilets</i></b>                                              | <i>Neither Agree nor disagree</i> | 37.6-62.4 | Sliding scale | Prim; Sec;<br>FE | 2019; 2021 |
|                                   |                                                                                                         | <i>Agree</i>                      | 62.5-87.4 |               |                  |            |
|                                   |                                                                                                         | <i>Strongly Agree</i>             | 87.5-100  |               |                  |            |
|                                   |                                                                                                         | <i>Strongly Disagree</i>          | 0-12.5    |               |                  |            |
| <b><i>About speaking out:</i></b> | <b><i>Adults in my school/college ask for my opinion on things</i></b>                                  | <i>Never/ Rarely</i>              | NEVER     | String        | Prim; Sec;<br>FE | 2021       |
|                                   |                                                                                                         | <i>Sometimes</i>                  | SOMETIMES |               |                  |            |
|                                   |                                                                                                         | <i>Often</i>                      | OFTEN     |               |                  |            |
|                                   | <b><i>Adults in my school/college listen when I share my opinion</i></b>                                | <i>Never/ Rarely</i>              | NEVER     |               |                  |            |
|                                   |                                                                                                         | <i>Sometimes</i>                  | SOMETIMES |               |                  |            |
|                                   |                                                                                                         | <i>Often</i>                      | OFTEN     |               |                  |            |
|                                   | <b><i>My school/college friends ask my advice when they have a problem</i></b>                          | <i>Never/ Rarely</i>              | NEVER     |               |                  |            |
|                                   |                                                                                                         | <i>Sometimes</i>                  | SOMETIMES |               |                  |            |
|                                   |                                                                                                         | <i>Often</i>                      | OFTEN     |               |                  |            |
|                                   | <b><i>If I see something wrong in school/college I feel I can tell someone and they will listen</i></b> | <i>Never/ Rarely</i>              | NEVER     |               |                  |            |
|                                   |                                                                                                         | <i>Sometimes</i>                  | SOMETIMES |               |                  |            |
|                                   |                                                                                                         | <i>Often</i>                      | OFTEN     |               |                  |            |
|                                   | <b><i>I can speak up in class when I have a comment or question</i></b>                                 | <i>Never/ Rarely</i>              | NEVER     |               |                  |            |
|                                   |                                                                                                         | <i>Sometimes</i>                  | SOMETIMES |               |                  |            |
|                                   |                                                                                                         | <i>Often</i>                      | OFTEN     |               |                  |            |
|                                   | <b><i>I can speak up when I see someone else being hurt</i></b>                                         | <i>Never/ Rarely</i>              | NEVER     |               |                  |            |
|                                   |                                                                                                         |                                   |           |               |                  |            |

Note: A \* in the *Matched* or *Year Included* columns indicates that the *Question* or *Label* column contain differences in the \* indicated year or survey version

## OxWell 2021 FE

|  |                                                                                                                                    |                                                                                                                                                                          |                                                                                                    |        |                  |            |
|--|------------------------------------------------------------------------------------------------------------------------------------|--------------------------------------------------------------------------------------------------------------------------------------------------------------------------|----------------------------------------------------------------------------------------------------|--------|------------------|------------|
|  | <i>I can ask adults in my school/college for help when I need it</i>                                                               | <i>Sometimes</i><br><i>Often</i><br><i>Never/ Rarely</i><br><i>Sometimes</i><br><i>Often</i>                                                                             | SOMETIMES<br>OFTEN<br>NEVER<br>SOMETIMES<br>OFTEN                                                  |        |                  |            |
|  | <i>How much do you agree with the following statement: I identify with my school/college community</i>                             | <i>Fully disagree</i><br><i>Disagree</i><br><i>Somewhat disagree</i><br><i>Neither agree nor disagree</i><br><i>Somewhat agree</i><br><i>Agree</i><br><i>Fully agree</i> | FULLDISAG<br>REE<br>DISAGREE<br>SOMEDISAG<br>REE<br>NEITHER<br>SOMEAGRE<br>E<br>AGREE<br>FULLAGREE | String | Prim; Sec;<br>FE | 2021       |
|  | <i>Do you feel your teachers have high expectations of you?</i>                                                                    | <i>Never</i><br><i>Rarely</i><br><i>Sometimes</i><br><i>Often</i>                                                                                                        | NEVER<br>RARELY<br>SOMETIMES<br>OFTEN                                                              | String | Sec; FE          | 2021       |
|  | <i>Over this school/college year, do you feel you have often been unfairly picked on by a teacher?</i>                             | <i>Yes</i><br><i>No</i>                                                                                                                                                  | Y<br>N                                                                                             | String | Sec; FE          | 2021       |
|  | <i>At school/college, are you often told off or punished for things you have not done?</i>                                         | <i>Never</i><br><i>Rarely</i><br><i>Sometimes</i><br><i>Often</i>                                                                                                        | NEVER<br>RARELY<br>SOMETIMES<br>OFTEN                                                              | String | Sec; FE          | 2021       |
|  | <i>Have you received information from school/college that enables you to tell whether a friendship or relationship is abusive?</i> | <i>Yes</i><br><i>No</i><br><i>Don't know</i>                                                                                                                             | Y<br>N<br>R                                                                                        | String | Sec; Fe          | 2019; 2021 |
|  | <i>How many secondary schools have you attended?</i>                                                                               | <i>Just one</i><br><i>2</i><br><i>3 or more</i>                                                                                                                          | 1<br>2<br>3ORMORE                                                                                  | String | Sec; FE          | 2021       |
|  | <i>During this academic year, have you ever been asked to leave your place of learning because of your behaviour?</i>              | <i>No</i><br><i>Once or twice this year</i>                                                                                                                              | N<br>1TO2                                                                                          | String | Sec; FE          | 2021       |

Note: A \* in the *Matched* or *Year Included* columns indicates that the *Question* or *Label* column contain differences in the \* indicated year or survey version

## OxWell 2021 FE

|  |                                                                                                                                                             |                                                                                |           |          |         |      |
|--|-------------------------------------------------------------------------------------------------------------------------------------------------------------|--------------------------------------------------------------------------------|-----------|----------|---------|------|
|  |                                                                                                                                                             | <i>Several times this year</i>                                                 | SEVERAL   |          |         |      |
|  |                                                                                                                                                             | <i>Frequently this year</i>                                                    | FREQUENTL |          |         |      |
|  |                                                                                                                                                             |                                                                                | Y         |          |         |      |
|  | <b>Where did you go to last time you were asked to leave your place of learning?</b>                                                                        |                                                                                |           | Tick box | Sec; FE | 2021 |
|  |                                                                                                                                                             | Outside the classroom (e.g. corridor)                                          | Y         |          |         |      |
|  |                                                                                                                                                             | A senior teacher's office                                                      | Y         |          |         |      |
|  |                                                                                                                                                             | A dedicated area that is used for students who have been sent out of the class | Y         |          |         |      |
|  |                                                                                                                                                             | Another place in school used to isolate/separate students                      | Y         |          |         |      |
|  |                                                                                                                                                             | I went home                                                                    | Y         |          |         |      |
|  |                                                                                                                                                             | Other                                                                          | Y         |          |         |      |
|  | <b>What impact did being asked to leave the classroom have on you?</b>                                                                                      | I found it helpful                                                             | HELPFUL   | String   | Sec; FE | 2021 |
|  |                                                                                                                                                             | I found it unhelpful                                                           | NOTHELPFU |          |         |      |
|  |                                                                                                                                                             | No impact                                                                      | L<br>NO   |          |         |      |
|  | <b>During this academic year, have you ever been given a detention?</b>                                                                                     | No                                                                             | N         | String   | Sec; FE | 2021 |
|  |                                                                                                                                                             | <i>Once or twice this year</i>                                                 | 1TO2      |          |         |      |
|  |                                                                                                                                                             | <i>Several times this year</i>                                                 | SEVERAL   |          |         |      |
|  |                                                                                                                                                             | <i>Frequently this year</i>                                                    | FREQUENTL |          |         |      |
|  |                                                                                                                                                             |                                                                                | Y         |          |         |      |
|  | <b>Have you ever been excluded from school/college?</b>                                                                                                     | Yes                                                                            | Y         | String   | Sec; FE | 2021 |
|  |                                                                                                                                                             | No                                                                             | N         |          |         |      |
|  |                                                                                                                                                             | <i>Don't know what this means</i>                                              | D         |          |         |      |
|  | <b>Was this ever a permanent exclusion?</b>                                                                                                                 | Yes                                                                            | Y         | String   | Sec; FE | 2021 |
|  |                                                                                                                                                             | No                                                                             | N         |          |         |      |
|  |                                                                                                                                                             | <i>Don't know what this means</i>                                              | D         |          |         |      |
|  | <b>In year 11, were you able to get all the information you needed to give a clear picture of the full range of choices available to you after year 11?</b> | Yes                                                                            | Y         | String   | FE      | 2021 |
|  |                                                                                                                                                             | No                                                                             | N         |          |         |      |
|  | <b>Do you expect to continue in education or training next year?</b>                                                                                        | Yes                                                                            | Y         | String   | FE      | 2021 |
|  |                                                                                                                                                             | No                                                                             | N         |          |         |      |

Note: A \* in the *Matched* or *Year Included* columns indicates that the *Question* or *Label* column contain differences in the \* indicated year or survey version

## OxWell 2021 FE

|                                                                                | <i>Don't know</i>                                  | D |          |    |      |
|--------------------------------------------------------------------------------|----------------------------------------------------|---|----------|----|------|
| <b>If you need help to plan for your future where would you get this from?</b> |                                                    |   | Tick box | FE | 2021 |
|                                                                                | <i>Websites</i>                                    | Y |          |    |      |
|                                                                                | <i>Information from school/college</i>             | Y |          |    |      |
|                                                                                | <i>Careers advisor</i>                             | Y |          |    |      |
|                                                                                | <i>Careers fair</i>                                | Y |          |    |      |
|                                                                                | <i>School/College staff</i>                        | Y |          |    |      |
|                                                                                | <i>Someone outside of school/college</i>           | Y |          |    |      |
|                                                                                | <i>Your family/carers/the people you live with</i> | Y |          |    |      |
|                                                                                | <i>Other</i>                                       | Y |          |    |      |
|                                                                                | <i>Not sure where to get advice</i>                | Y |          |    |      |

Note: A \* in the *Matched* or *Year Included* columns indicates that the *Question* or *Label* column contain differences in the \* indicated year or survey version

## OxWell 2021 FE

**SAFETY**

| CODE | Contingent | Question                                                                                                                          | Label                          | Value     | Type          | Matched          | Year Included       |
|------|------------|-----------------------------------------------------------------------------------------------------------------------------------|--------------------------------|-----------|---------------|------------------|---------------------|
|      |            | <b>When you are at school/college, how safe do you feel?</b>                                                                      | <i>Very unsafe</i>             | 0-12.5    | Sliding scale | Prim; Sec;<br>FE | 2019; 2020;<br>2021 |
|      |            |                                                                                                                                   | <i>Unsafe</i>                  | 12.6-37.5 |               |                  |                     |
|      |            |                                                                                                                                   | <i>Neither safe nor unsafe</i> | 37.6-62.4 |               |                  |                     |
|      |            |                                                                                                                                   | <i>Safe</i>                    | 62.5-87.4 |               |                  |                     |
|      |            |                                                                                                                                   | <i>Very safe</i>               | 87.5-100  |               |                  |                     |
|      |            | <b>How safe do you feel at home or the place where you live?</b>                                                                  | <i>Very unsafe</i>             | 0-12.5    | Sliding scale | Prim; Sec;<br>FE | 2019; 2020;<br>2021 |
|      |            |                                                                                                                                   | <i>Unsafe</i>                  | 12.6-37.5 |               |                  |                     |
|      |            |                                                                                                                                   | <i>Neither safe nor unsafe</i> | 37.6-62.4 |               |                  |                     |
|      |            |                                                                                                                                   | <i>Safe</i>                    | 62.5-87.4 |               |                  |                     |
|      |            |                                                                                                                                   | <i>Very safe</i>               | 87.5-100  |               |                  |                     |
|      |            | <b>How safe do you from crime?</b>                                                                                                | <i>Very unsafe</i>             | 0-12.5    | Sliding scale | Prim             | 2019; 2021          |
|      |            |                                                                                                                                   | <i>Unsafe</i>                  | 12.6-37.5 |               |                  |                     |
|      |            |                                                                                                                                   | <i>Neither safe nor unsafe</i> | 37.6-62.4 |               |                  |                     |
|      |            |                                                                                                                                   | <i>Safe</i>                    | 62.5-87.4 |               |                  |                     |
|      |            |                                                                                                                                   | <i>Very safe</i>               | 87.5-100  |               |                  |                     |
|      |            | <b>Some young people feel worried about things happening around them. To what extent do you worry about the following topics:</b> |                                |           |               |                  |                     |
|      |            | <b>Having enough money to pay for food or living costs</b>                                                                        | <i>Not at all worried</i>      | 0-12.5    | Sliding scale | Sec; FE          | 2020; 2021          |
|      |            |                                                                                                                                   | <i>Not very worried</i>        | 12.6-37.5 |               |                  |                     |
|      |            |                                                                                                                                   | <i>Quite worried</i>           | 37.6-62.4 |               |                  |                     |
|      |            |                                                                                                                                   | <i>Worried</i>                 | 62.5-87.4 |               |                  |                     |
|      |            |                                                                                                                                   | <i>Extremely worried</i>       | 87.5-100  |               |                  |                     |
|      |            | <b>Doing well at school/college</b>                                                                                               | <i>Not at all worried</i>      | 0-12.5    | Sliding scale | Sec; FE          | 2020; 2021          |
|      |            |                                                                                                                                   | <i>Not very worried</i>        | 12.6-37.5 |               |                  |                     |
|      |            |                                                                                                                                   | <i>Quite worried</i>           | 37.6-62.4 |               |                  |                     |
|      |            |                                                                                                                                   | <i>Worried</i>                 | 62.5-87.4 |               |                  |                     |
|      |            |                                                                                                                                   | <i>Extremely worried</i>       | 87.5-100  |               |                  |                     |
|      |            | <b>The climate/environment</b>                                                                                                    | <i>Not at all worried</i>      | 0-12.5    | Sliding scale | Sec; FE          | 2020; 2021          |
|      |            |                                                                                                                                   | <i>Not very worried</i>        | 12.6-37.5 |               |                  |                     |
|      |            |                                                                                                                                   | <i>Quite worried</i>           | 37.6-62.4 |               |                  |                     |
|      |            |                                                                                                                                   | <i>Worried</i>                 | 62.5-87.4 |               |                  |                     |
|      |            |                                                                                                                                   | <i>Extremely worried</i>       | 87.5-100  |               |                  |                     |
|      |            | <b>Not being able to sit key school/college examinations</b>                                                                      | <i>Not at all worried</i>      | 0-12.5    | Sliding scale | Sec; FE          | 2020; 2021          |
|      |            |                                                                                                                                   | <i>Not very worried</i>        | 12.6-37.5 |               |                  |                     |
|      |            |                                                                                                                                   | <i>Quite worried</i>           | 37.6-62.4 |               |                  |                     |

Note: A \* in the *Matched* or *Year Included* columns indicates that the *Question* or *Label* column contain differences in the \* indicated year or survey version



## OxWell 2021 FE

|  |                                                                                                                                         |                                                                                                                                                                          |                                                                                    |               |         |            |
|--|-----------------------------------------------------------------------------------------------------------------------------------------|--------------------------------------------------------------------------------------------------------------------------------------------------------------------------|------------------------------------------------------------------------------------|---------------|---------|------------|
|  | <b>My appearance (how I look and what I wear)</b>                                                                                       | <i>Worried</i><br><i>Extremely worried</i><br><i>Not at all worried</i><br><i>Not very worried</i><br><i>Quite worried</i><br><i>Worried</i><br><i>Extremely worried</i> | 62.5-87.4<br>87.5-100<br>0-12.5<br>12.6-37.5<br>37.6-62.4<br>62.5-87.4<br>87.5-100 | Sliding scale | Sec; FE | 2020; 2021 |
|  | <b>How often in the last year have you stolen any money or property that someone was holding, carrying or wearing at the time?</b>      | <i>Not at all</i><br><i>Once</i><br><i>2 - 5 times</i><br><i>More than 6 times</i>                                                                                       | NO<br>ONCE<br>2TO5<br>MORETHAN<br>6                                                | String        | FE      | 2021       |
|  | <b>How often in the last year have you hit, kicked or punched someone else on purpose with the intention of really hurting them?</b>    | <i>Not at all</i><br><i>Once</i><br><i>2 - 5 times</i><br><i>More than 6 times</i>                                                                                       | NO<br>ONCE<br>2TO5<br>MORETHAN<br>6                                                | String        | FE      | 2021       |
|  | <b>How often in the last year have you carried a knife or other weapon with you for protection or in case it was needed in a fight?</b> | <i>Not at all</i><br><i>Once</i><br><i>2 - 5 times</i><br><i>More than 6 times</i>                                                                                       | NO<br>ONCE<br>2TO5<br>MORETHAN<br>6                                                | String        | FE      | 2021       |

Note: A \* in the *Matched* or *Year Included* columns indicates that the *Question* or *Label* column contain differences in the \* indicated year or survey version

## OxWell 2021 FE

## INTERNET

| CODE | Contingent | Question                                                                                                                                              | Label                                           | Value     | Type          | Matched | Year Included |
|------|------------|-------------------------------------------------------------------------------------------------------------------------------------------------------|-------------------------------------------------|-----------|---------------|---------|---------------|
|      |            | <b>Have you ever posted or done anything on the internet that you later regretted?</b>                                                                | Yes                                             | Y         | String        | Sec; FE | 2020; 2021    |
|      |            |                                                                                                                                                       | No                                              | N         |               |         |               |
|      |            |                                                                                                                                                       | Would rather not say                            | R         |               |         |               |
|      |            | <b>How often has this happened?</b>                                                                                                                   | Never                                           | 0-12.5    | Sliding scale | Sec; FE | 2020; 2021    |
|      |            |                                                                                                                                                       | Once or twice                                   | 12.6-37.5 |               |         |               |
|      |            |                                                                                                                                                       | A few times                                     | 37.6-62.4 |               |         |               |
|      |            |                                                                                                                                                       | Weekly                                          | 62.5-87.4 |               |         |               |
|      |            |                                                                                                                                                       | Daily                                           | 87.5-100  |               |         |               |
|      |            | <b>Which of the following was this:</b>                                                                                                               | Posting a photo/video of yourself               | Y         | Tick box      | Sec; FE | 2020; 2021    |
|      |            |                                                                                                                                                       | Posting a photo/video of someone else           | Y         |               |         |               |
|      |            |                                                                                                                                                       | Writing a public comment                        | Y         |               |         |               |
|      |            |                                                                                                                                                       | Writing a private comment                       | Y         |               |         |               |
|      |            |                                                                                                                                                       | Sending money to someone                        | Y         |               |         |               |
|      |            |                                                                                                                                                       | Buying or doing something that might be illegal | Y         |               |         |               |
|      |            | <b>About how many hours a day do you usually spend on social media?</b>                                                                               | 0 hours                                         | 0-12.5    | Sliding scale | Sec; FE | 2021          |
|      |            |                                                                                                                                                       | 1 hour                                          | 12.6-37.5 |               |         |               |
|      |            |                                                                                                                                                       | 2 hours                                         | 37.6-62.4 |               |         |               |
|      |            |                                                                                                                                                       | 3 hours                                         | 62.5-87.4 |               |         |               |
|      |            |                                                                                                                                                       | 4 hours or more                                 | 87.5-100  |               |         |               |
|      |            | <b>About how many hours a day do you usually play games on an electronic device (e.g. computer, game console or phone)</b>                            | 0 hours                                         | 0-12.5    | Sliding scale | Sec; FE | 2021          |
|      |            |                                                                                                                                                       | 1 hour                                          | 12.6-37.5 |               |         |               |
|      |            |                                                                                                                                                       | 2 hours                                         | 37.6-62.4 |               |         |               |
|      |            |                                                                                                                                                       | 3 hours                                         | 62.5-87.4 |               |         |               |
|      |            |                                                                                                                                                       | 4 hours or more                                 | 87.5-100  |               |         |               |
|      |            | <b>About how many hours a day do you usually play games on a computer or games console (PlayStation, Xbox, Nintendo Wii, etc.) in your free time?</b> | 0 hours                                         | 0-12.5    | Sliding scale | Sec; FE | 2021          |
|      |            |                                                                                                                                                       | 1 hour                                          | 12.6-37.5 |               |         |               |
|      |            |                                                                                                                                                       | 2 hours                                         | 37.6-62.4 |               |         |               |

Note: A \* in the Matched or Year Included columns indicates that the Question or Label column contain differences in the \* indicated year or survey version

## OxWell 2021 FE

|  |  |                                                                                              |                 |           |               |         |      |
|--|--|----------------------------------------------------------------------------------------------|-----------------|-----------|---------------|---------|------|
|  |  |                                                                                              | 3 hours         | 62.5-87.4 |               |         |      |
|  |  |                                                                                              | 4 hours or more | 87.5-100  |               |         |      |
|  |  | <b>About how many hours a day do you usually play games on your phone in your free time?</b> | 0 hours         | 0-12.5    | Sliding scale | Sec; FE | 2021 |
|  |  |                                                                                              | 1 hour          | 12.6-37.5 |               |         |      |
|  |  |                                                                                              | 2 hours         | 37.6-62.4 |               |         |      |
|  |  |                                                                                              | 3 hours         | 62.5-87.4 |               |         |      |
|  |  |                                                                                              | 4 hours or more | 87.5-100  |               |         |      |

Note: A \* in the *Matched* or *Year Included* columns indicates that the *Question* or *Label* column contain differences in the \* indicated year or survey version

## OxWell 2021 FE

**GAMING**

| CODE | Contingent | Question                                                                                                           | Label             | Value     | Type   | Matched | Year Included |
|------|------------|--------------------------------------------------------------------------------------------------------------------|-------------------|-----------|--------|---------|---------------|
|      |            | <b><i>About gaming, how often in the last six months:<br/>did you think about playing a game all day long?</i></b> | <i>Never</i>      | NEVER     | String | Sec; FE | 2021          |
|      |            |                                                                                                                    | <i>Rarely</i>     | RARELY    |        |         |               |
|      |            |                                                                                                                    | <i>Sometimes</i>  | SOMETIMES |        |         |               |
|      |            |                                                                                                                    | <i>Often</i>      | OFTEN     |        |         |               |
|      |            |                                                                                                                    | <i>Very often</i> | VERYOFTEN |        |         |               |
|      |            | <b><i>did you spend increasing amounts of time on games?</i></b>                                                   | <i>Never</i>      | NEVER     | String | Sec; FE | 2021          |
|      |            |                                                                                                                    | <i>Rarely</i>     | RARELY    |        |         |               |
|      |            |                                                                                                                    | <i>Sometimes</i>  | SOMETIMES |        |         |               |
|      |            |                                                                                                                    | <i>Often</i>      | OFTEN     |        |         |               |
|      |            |                                                                                                                    | <i>Very often</i> | VERYOFTEN |        |         |               |
|      |            | <b><i>did you play games to forget about real life?</i></b>                                                        | <i>Never</i>      | NEVER     | String | Sec; FE | 2021          |
|      |            |                                                                                                                    | <i>Rarely</i>     | RARELY    |        |         |               |
|      |            |                                                                                                                    | <i>Sometimes</i>  | SOMETIMES |        |         |               |
|      |            |                                                                                                                    | <i>Often</i>      | OFTEN     |        |         |               |
|      |            |                                                                                                                    | <i>Very often</i> | VERYOFTEN |        |         |               |
|      |            | <b><i>have others unsuccessfully tried to reduce your game use?</i></b>                                            | <i>Never</i>      | NEVER     | String | Sec; FE | 2021          |
|      |            |                                                                                                                    | <i>Rarely</i>     | RARELY    |        |         |               |
|      |            |                                                                                                                    | <i>Sometimes</i>  | SOMETIMES |        |         |               |
|      |            |                                                                                                                    | <i>Often</i>      | OFTEN     |        |         |               |
|      |            |                                                                                                                    | <i>Very often</i> | VERYOFTEN |        |         |               |
|      |            | <b><i>have you felt bad when you were unable to play?</i></b>                                                      | <i>Never</i>      | NEVER     | String | Sec; FE | 2021          |
|      |            |                                                                                                                    | <i>Rarely</i>     | RARELY    |        |         |               |
|      |            |                                                                                                                    | <i>Sometimes</i>  | SOMETIMES |        |         |               |
|      |            |                                                                                                                    | <i>Often</i>      | OFTEN     |        |         |               |
|      |            |                                                                                                                    | <i>Very often</i> | VERYOFTEN |        |         |               |
|      |            | <b><i>did you have fights with others (e.g., family, friends) over your time spent on games?</i></b>               | <i>Never</i>      | NEVER     | String | Sec; FE | 2021          |
|      |            |                                                                                                                    | <i>Rarely</i>     | RARELY    |        |         |               |
|      |            |                                                                                                                    | <i>Sometimes</i>  | SOMETIMES |        |         |               |
|      |            |                                                                                                                    | <i>Often</i>      | OFTEN     |        |         |               |
|      |            |                                                                                                                    | <i>Very often</i> | VERYOFTEN |        |         |               |
|      |            | <b><i>have you neglected other important activities (e.g., school/college, work, sports) to play games?</i></b>    | <i>Never</i>      | NEVER     | String | Sec; FE | 2021          |
|      |            |                                                                                                                    | <i>Rarely</i>     | RARELY    |        |         |               |
|      |            |                                                                                                                    | <i>Sometimes</i>  | SOMETIMES |        |         |               |
|      |            |                                                                                                                    | <i>Often</i>      | OFTEN     |        |         |               |
|      |            |                                                                                                                    | <i>Very often</i> | VERYOFTEN |        |         |               |
|      |            | <b><i>Have you ever spent money on in-game purchases?</i></b>                                                      | Yes               | Y         | String | Sec; FE | 2021          |

Note: A \* in the Matched or Year Included columns indicates that the Question or Label column contain differences in the \* indicated year or survey version

## OxWell 2021 FE

|  | No                      | N                |        |         |      |
|--|-------------------------|------------------|--------|---------|------|
|  | <i>Never</i>            | NEVER            | String | Sec; FE | 2021 |
|  | <i>Once</i>             | ONCE             |        |         |      |
|  | <i>Couple of times</i>  | TWICE            |        |         |      |
|  | <i>Few times a week</i> | FEWTIMES<br>WEEK |        |         |      |
|  | <i>Every day</i>        | EVERYDAY         |        |         |      |
|  | <i>All the time</i>     | CONSTANT         |        |         |      |

## COVID

| CODE | Contingent | Question                                                                                     | Label                                    | Value     | Type          | Matched          | Year Included |
|------|------------|----------------------------------------------------------------------------------------------|------------------------------------------|-----------|---------------|------------------|---------------|
|      |            | <b>Do you think you have had Covid?</b>                                                      | <i>No</i>                                | N         | String        | Prim; Sec;<br>FE | 2021          |
|      |            |                                                                                              | <i>Possibly</i>                          | POSSIBLY  |               |                  |               |
|      |            |                                                                                              | <i>Probably</i>                          | PROBABLY  |               |                  |               |
|      |            |                                                                                              | <i>Yes (confirmed by test)</i>           | Y         |               |                  |               |
|      |            | <b>Compared to before the first lockdown, how easy have you found it to remember things?</b> | <i>Very difficult</i>                    | 0-12.5    | Sliding scale | Prim; Sec;<br>FE | 2021          |
|      |            |                                                                                              | <i>Quite difficult</i>                   | 12.6-37.5 |               |                  |               |
|      |            |                                                                                              | <i>The same</i>                          | 37.6-62.4 |               |                  |               |
|      |            |                                                                                              | <i>Quite easy</i>                        | 62.5-87.4 |               |                  |               |
|      |            |                                                                                              | <i>Very easy</i>                         | 87.5-100  |               |                  |               |
|      |            | <b>Compared to before the first lockdown, how easy have you found it to concentrate?</b>     | <i>Very difficult</i>                    | 0-12.5    | Sliding scale | Prim; Sec;<br>FE | 2021          |
|      |            |                                                                                              | <i>Quite difficult</i>                   | 12.6-37.5 |               |                  |               |
|      |            |                                                                                              | <i>The same</i>                          | 37.6-62.4 |               |                  |               |
|      |            |                                                                                              | <i>Quite easy</i>                        | 62.5-87.4 |               |                  |               |
|      |            |                                                                                              | <i>Very easy</i>                         | 87.5-100  |               |                  |               |
|      |            | <b>Compared to before the first lockdown, how easy have you found it to think clearly?</b>   | <i>Very difficult</i>                    | 0-12.5    | Sliding scale | Prim; Sec;<br>FE | 2021          |
|      |            |                                                                                              | <i>Quite difficult</i>                   | 12.6-37.5 |               |                  |               |
|      |            |                                                                                              | <i>The same</i>                          | 37.6-62.4 |               |                  |               |
|      |            |                                                                                              | <i>Quite easy</i>                        | 62.5-87.4 |               |                  |               |
|      |            |                                                                                              | <i>Very easy</i>                         | 87.5-100  |               |                  |               |
|      |            | <b>Would you take a COVID-19 vaccine (approved for use in the UK) if offered?</b>            | <i>Eager to get a COVID-19 vaccine</i>   | EAGER     | String        | Prim; Sec;<br>FE | 2021          |
|      |            |                                                                                              | <i>Willing to get a COVID-19 vaccine</i> | WILLING   |               |                  |               |

Note: A \* in the Matched or Year Included columns indicates that the Question or Label column contain differences in the \* indicated year or survey version

## OxWell 2021 FE

|  |  |                                                      |                     |
|--|--|------------------------------------------------------|---------------------|
|  |  | <i>Not bothered about getting a COVID-19 vaccine</i> | NOTBOTHE<br>RED     |
|  |  | <i>Unwilling to get a COVID-19 vaccine</i>           | UNWILLING           |
|  |  | <i>Anti-vaccination for COVID-19</i>                 | ANTIVACCIN<br>ATION |
|  |  | <i>Don't know</i>                                    | DONTKNOW            |

Note: A \* in the *Matched* or *Year Included* columns indicates that the *Question* or *Label* column contain differences in the \* indicated year or survey version

## OxWell 2021 FE

**BULLYING**

| CODE | Contingent | Question                                                                    | Label                                           | Value     | Type          | Matched           | Year Included           |
|------|------------|-----------------------------------------------------------------------------|-------------------------------------------------|-----------|---------------|-------------------|-------------------------|
|      |            | <b>How well do you think your school/college deals with bullying</b>        | <i>Very badly</i>                               | 0-12.5    | Sliding scale | Prim; Sec;<br>FE  | 2019; 2021              |
|      |            |                                                                             | <i>Not very well</i>                            | 12.6-37.5 |               |                   |                         |
|      |            |                                                                             | <i>Average</i>                                  | 37.6-62.4 |               |                   |                         |
|      |            |                                                                             | <i>Quite well</i>                               | 62.5-87.4 |               |                   |                         |
|      |            |                                                                             | <i>Extremely well</i>                           | 87.5-100  |               |                   |                         |
|      |            | <b>Have you been bullied in the last year?</b>                              | <i>No</i>                                       | 0-12.5    | Sliding scale | Prim*;<br>Sec; FE | 2019*;<br>2020;<br>2021 |
|      |            |                                                                             | <i>Not often (e.g. once or twice)</i>           | 12.6-37.5 |               |                   |                         |
|      |            |                                                                             | <i>Sometimes (e.g. monthly)</i>                 | 37.6-62.4 |               |                   |                         |
|      |            |                                                                             | <i>Quite often (e.g. weekly)</i>                | 62.5-87.4 |               |                   |                         |
|      |            |                                                                             | <i>Most days</i>                                | 87.5-100  |               |                   |                         |
|      |            | <b>Is the bullying still happening?</b>                                     | Yes                                             | Y         | String        | Prim; Sec;<br>FE  | 2019; 2021              |
|      |            |                                                                             | No                                              | N         |               |                   |                         |
|      |            |                                                                             | Would rather not say                            | R         |               |                   |                         |
|      |            | <b>If you have been bullied in the last year in what way did it happen?</b> | Physical                                        | Y         | Tick box      | Prim; Sec;<br>FE  | 2019*;<br>2020;<br>2021 |
|      |            |                                                                             | Verbal                                          | Y         |               |                   |                         |
|      |            |                                                                             | Cyber                                           | Y         |               |                   |                         |
|      |            |                                                                             | Isolated or Excluded                            | Y         |               |                   |                         |
|      |            |                                                                             | Other                                           | Y         |               |                   |                         |
|      |            | <b>What age is the bully or bullies?</b>                                    | In my year group                                | SAME      | String        | Sec: FE           | 2021                    |
|      |            |                                                                             | In a younger year group                         | YOUNGER   |               |                   |                         |
|      |            |                                                                             | In an older year group                          | OLDER     |               |                   |                         |
|      |            |                                                                             | Both younger and older year groups              | MIXED     |               |                   |                         |
|      |            |                                                                             | An adult                                        | ADULT     |               |                   |                         |
|      |            |                                                                             | Would rather not say                            | R         |               |                   |                         |
|      |            | <b>If you have ever been bullied, did someone help you deal with it?</b>    | Parent, step-parent or carer                    | Y         | Tick box      | Prim; Sec;<br>FE  | 2019; 2021*             |
|      |            |                                                                             | Someone else in your family                     | Y         |               |                   |                         |
|      |            |                                                                             | Friend(s)                                       | Y         |               |                   |                         |
|      |            |                                                                             | A teacher or other adult at your school/college | Y         |               |                   |                         |

Note: A \* in the *Matched* or *Year Included* columns indicates that the *Question* or *Label* column contain differences in the \* indicated year or survey version

## OxWell 2021 FE

|  |                                                                                      |                                                                                        |                                                  |          |               |             |  |
|--|--------------------------------------------------------------------------------------|----------------------------------------------------------------------------------------|--------------------------------------------------|----------|---------------|-------------|--|
|  |                                                                                      | A mental health worker (from outside the school/college) who visits the school/college | Y                                                |          |               |             |  |
|  |                                                                                      | A doctor, nurse (outside school/college), psychologist                                 | Y                                                |          |               |             |  |
|  |                                                                                      | A counsellor, youth worker or social worker                                            | Y                                                |          |               |             |  |
|  |                                                                                      | Internet advice sites, forums, chatrooms etc                                           | Y                                                |          |               |             |  |
|  |                                                                                      | No-one                                                                                 | Y                                                |          |               |             |  |
|  | <b>Where does the bullying usually happen?</b>                                       | The journey to/from school/college                                                     | TOFROMSC                                         | String   | Prim; Sec; FE | 2019; 2021* |  |
|  |                                                                                      | Online/social media sites                                                              | HOO<br>L<br>I<br>N<br>T<br>E<br>R<br>N<br>E<br>T |          |               |             |  |
|  |                                                                                      | During lessons                                                                         | C<br>L<br>A<br>S<br>S<br>R<br>O<br>O<br>M        |          |               |             |  |
|  |                                                                                      | In school/college but outside of lessons                                               | O<br>T<br>H<br>E<br>R<br>S<br>C<br>H<br>O<br>L   |          |               |             |  |
|  |                                                                                      | At home                                                                                | H<br>O<br>M<br>E                                 |          |               |             |  |
|  |                                                                                      | The place you are living now                                                           | P<br>L<br>A<br>C<br>E<br>M<br>E<br>N<br>T        |          |               |             |  |
|  |                                                                                      | Outside                                                                                | O<br>U<br>T<br>S<br>I<br>D<br>E                  |          |               |             |  |
|  |                                                                                      | Other                                                                                  | O<br>T<br>H<br>E<br>R                            |          |               |             |  |
|  | <b>What do students in your school/college do if they see someone being bullied?</b> |                                                                                        |                                                  | Tick box | Prim; Sec; FE | 2021        |  |
|  |                                                                                      | Try to stop the bullying                                                               | Y                                                |          |               |             |  |
|  |                                                                                      | Tell a teacher/lecturer                                                                | Y                                                |          |               |             |  |
|  |                                                                                      | Laugh                                                                                  | Y                                                |          |               |             |  |
|  |                                                                                      | Join in                                                                                | Y                                                |          |               |             |  |
|  |                                                                                      | Nothing                                                                                | Y                                                |          |               |             |  |

## SELF-HARM

| CODE | Contingent | Question                                                                                                                               | Label                    | Value     | Type          | Matched | Year Included      |
|------|------------|----------------------------------------------------------------------------------------------------------------------------------------|--------------------------|-----------|---------------|---------|--------------------|
|      |            | <b>Have you ever deliberately self-harmed (for example by taking an overdose or deliberately injuring yourself in some other way)?</b> | Yes                      | Y         | String        | Sec; FE | 2019*, 2020, 2021* |
|      |            |                                                                                                                                        | No                       | N         |               |         |                    |
|      |            |                                                                                                                                        | Prefer not to say        | R         |               |         |                    |
|      |            |                                                                                                                                        | Not sure what this means | D         |               |         |                    |
|      |            | <b>Have you ever deliberately injured yourself in some way?</b>                                                                        | Never                    | 0-12.5    | Sliding scale | Sec; FE | 2019, 2020, 2021   |
|      |            |                                                                                                                                        | Once or twice            | 12.6-37.5 |               |         |                    |
|      |            |                                                                                                                                        | A few times              | 37.6-62.4 |               |         |                    |

Note: A \* in the Matched or Year Included columns indicates that the Question or Label column contain differences in the \* indicated year or survey version



## OxWell 2021 FE

|  |                                                                                                                    |                                                         |           |               |         |                   |
|--|--------------------------------------------------------------------------------------------------------------------|---------------------------------------------------------|-----------|---------------|---------|-------------------|
|  |                                                                                                                    | <i>Weekly</i>                                           | 62.5-87.4 |               |         |                   |
|  |                                                                                                                    | <i>Daily</i>                                            | 87.5-100  |               |         |                   |
|  | <b>How old were you when you first self-harmed?</b>                                                                | <i>Age in years</i>                                     | 5 - 16    | Numeric       | Sec; FE | 2019, 2020, 2021  |
|  | <b>When did you last self-harm?</b>                                                                                | <i>In the last week</i>                                 | 0-12.5    | Sliding scale | Sec; FE | 2019, 2020, 2021  |
|  |                                                                                                                    | <i>In the last month</i>                                | 12.6-37.5 |               |         |                   |
|  |                                                                                                                    | <i>in the past 3-6 months</i>                           | 37.6-62.4 |               |         |                   |
|  |                                                                                                                    | <i>6 months to a year ago</i>                           | 62.5-87.4 |               |         |                   |
|  |                                                                                                                    | <i>Over a year ago</i>                                  | 87.5-100  |               |         |                   |
|  | <b>How old were you when you last self-harmed?</b>                                                                 | <i>Age in years</i>                                     | 5 - 16    | Numeric       | Sec; FE | 2019, 2020, 2021  |
|  | <b>Have you ever deliberately taken an overdose (e.g. of pills or other medication)?</b>                           | <i>No</i>                                               | N         | String        | Sec; FE | 2019, 2020, 2021* |
|  |                                                                                                                    | <i>Yes - Once</i>                                       | YONCE     |               |         |                   |
|  |                                                                                                                    | <i>Yes - On more than one occasion</i>                  | YMORE     |               |         |                   |
|  | <b>How old were you when you first overdosed?</b>                                                                  | <i>Age in years</i>                                     | 5 - 16    | Numeric       | Sec; FE | 2019, 2020, 2021  |
|  | <b>When did you last take an overdose?</b>                                                                         | <i>In the last week</i>                                 | 0-12.5    | Sliding scale | Sec; FE | 2019, 2020, 2021  |
|  |                                                                                                                    | <i>In the last month</i>                                | 12.6-37.5 |               |         |                   |
|  |                                                                                                                    | <i>In the past 3-6 months</i>                           | 37.6-62.4 |               |         |                   |
|  |                                                                                                                    | <i>6 months to a year ago</i>                           | 62.5-87.4 |               |         |                   |
|  |                                                                                                                    | <i>Over a year ago</i>                                  | 87.5-100  |               |         |                   |
|  | <b>The last time this happened, in what way did you self-harm/ overdose?</b>                                       | <i>Free text box</i>                                    |           | Free text     | Sec; FE | 2019, 2020, 2021  |
|  | <b>Have you ever needed any medical treatment for your self-harm injury/overdose from... (Tick all that apply)</b> |                                                         |           | Tick box      | Sec; FE | 2019, 2020, 2021  |
|  |                                                                                                                    | <i>My own first-aid</i>                                 | Y         |               |         |                   |
|  |                                                                                                                    | <i>Family-provided first-aid</i>                        | Y         |               |         |                   |
|  |                                                                                                                    | <i>School/college nurse/first-aid at school/college</i> | Y         |               |         |                   |
|  |                                                                                                                    | <i>Friends helped me</i>                                | Y         |               |         |                   |
|  |                                                                                                                    | <i>GP (family doctor)</i>                               | Y         |               |         |                   |
|  |                                                                                                                    | <i>Ambulance/paramedics</i>                             | Y         |               |         |                   |
|  |                                                                                                                    | <i>Hospital A&amp;E / acute mental health provision</i> | Y         |               |         |                   |
|  |                                                                                                                    | <i>Hospital with overnight stay on ward</i>             | Y         |               |         |                   |

Note: A \* in the *Matched* or *Year Included* columns indicates that the *Question* or *Label* column contain differences in the \* indicated year or survey version

## OxWell 2021 FE

|                                                                                                                 | <i>Other</i>                                                                               | Y |               |         |            |
|-----------------------------------------------------------------------------------------------------------------|--------------------------------------------------------------------------------------------|---|---------------|---------|------------|
|                                                                                                                 |                                                                                            |   |               |         |            |
| <b>Is there any support you would have liked to have accessed, or people you wish you could have talked to?</b> |                                                                                            |   | Tick box      | Sec; FE | 2021       |
|                                                                                                                 | <i>Parent, step-parent or carer</i>                                                        | Y |               |         |            |
|                                                                                                                 | <i>Brother or sister</i>                                                                   | Y |               |         |            |
|                                                                                                                 | <i>Someone else in your family</i>                                                         | Y |               |         |            |
|                                                                                                                 | <i>Friend(s)</i>                                                                           | Y |               |         |            |
|                                                                                                                 | <i>GP (family doctor)</i>                                                                  | Y |               |         |            |
|                                                                                                                 | <i>Social Worker</i>                                                                       | Y |               |         |            |
|                                                                                                                 | <i>School/college</i>                                                                      | Y |               |         |            |
|                                                                                                                 | <i>Nurse/welfare staff</i>                                                                 | Y |               |         |            |
|                                                                                                                 | <i>Another adult at school/college</i>                                                     | Y |               |         |            |
|                                                                                                                 | <i>A peer mentor at school/college</i>                                                     | Y |               |         |            |
|                                                                                                                 | <i>CAMHS</i>                                                                               | Y |               |         |            |
|                                                                                                                 | <i>Support service given by charity</i>                                                    | Y |               |         |            |
|                                                                                                                 | <i>An adult outside of school/college (at a sport club, another parent, family friend)</i> | Y |               |         |            |
|                                                                                                                 | <i>A telephone/text help-line</i>                                                          | Y |               |         |            |
|                                                                                                                 | <i>Website or online forum</i>                                                             | Y |               |         |            |
|                                                                                                                 | <i>Other</i>                                                                               | Y |               |         |            |
|                                                                                                                 | <i>Please enter:</i>                                                                       |   | Free text box |         |            |
|                                                                                                                 | <i>None of these</i>                                                                       | Y |               |         |            |
|                                                                                                                 |                                                                                            |   |               |         |            |
| <b>Is there anything that prevented you from accessing support for your self-harm?</b>                          |                                                                                            |   | Tick box      | Sec; FE | 2019, 2020 |
|                                                                                                                 | <i>Didn't know who to ask</i>                                                              | Y |               |         |            |
|                                                                                                                 | <i>Didn't like the person providing support</i>                                            | Y |               |         |            |
|                                                                                                                 | <i>Didn't feel safe to share</i>                                                           | Y |               |         |            |
|                                                                                                                 | <i>Worried I might not get taken seriously</i>                                             | Y |               |         |            |
|                                                                                                                 | <i>Didn't like to talk to strangers</i>                                                    | Y |               |         |            |

Note: A \* in the *Matched* or *Year Included* columns indicates that the *Question* or *Label* column contain differences in the \* indicated year or survey version

## OxWell 2021 FE

|  |                                                                                                                                                                                                                               |                                                                                                                                                                                                                                                                                                                                                                                                                                                                                                                                                                                                                       |          |      |
|--|-------------------------------------------------------------------------------------------------------------------------------------------------------------------------------------------------------------------------------|-----------------------------------------------------------------------------------------------------------------------------------------------------------------------------------------------------------------------------------------------------------------------------------------------------------------------------------------------------------------------------------------------------------------------------------------------------------------------------------------------------------------------------------------------------------------------------------------------------------------------|----------|------|
|  |                                                                                                                                                                                                                               | <p><i>Didn't want parents to know</i> Y</p> <p><i>Didn't want other young people to know</i> Y</p> <p><i>Didn't want teachers or staff in school/college to know</i> Y</p> <p><i>Worried I would not be seen as a priority by the service</i> Y</p> <p><i>Might have to wait too long to get help</i> Y</p> <p><i>Too much hassle to get the help</i> Y</p> <p><i>Did not want help</i> Y</p> <p><i>Didn't want to burden anyone else</i> Y</p> <p><i>Didn't want the stigma</i> Y</p> <p><i>Didn't know where to get help</i> Y</p> <p><i>Scared/worried about what people might say</i> Y</p> <p><i>Other</i> Y</p> |          |      |
|  | <p><b>Do any of the following reasons explain your motivation to take an overdose or harm yourself in some other way? (The following question refers to the LAST TIME you took an overdose or tried to harm yourself)</b></p> | <p><i>I wanted to show how desperate I was feeling</i> Y</p> <p><i>I wanted to die</i> Y</p> <p><i>I wanted to punish myself</i> Y</p> <p><i>I wanted to frighten someone</i> Y</p> <p><i>I wanted to get my own back on someone</i> Y</p> <p><i>I wanted to get relief from a terrible state of mind</i> Y</p> <p><i>I wanted to find out whether someone really loved me</i> Y</p> <p><i>I wanted to get some attention</i> Y</p> <p><i>I am not sure why I did it</i> Y</p>                                                                                                                                        | Tick box | 2021 |
|  | <p><b>Have you ever asked for support for your self-harm from the following?</b></p>                                                                                                                                          |                                                                                                                                                                                                                                                                                                                                                                                                                                                                                                                                                                                                                       |          |      |

Note: A \* in the *Matched* or *Year Included* columns indicates that the *Question* or *Label* column contain differences in the \* indicated year or survey version

## OxWell 2021 FE

|  |                                                |                                                  |                |               |         |      |  |
|--|------------------------------------------------|--------------------------------------------------|----------------|---------------|---------|------|--|
|  | <b>Parent, step-parent or carer</b>            |                                                  | Y              |               |         |      |  |
|  | <b>Regarding this support, are you</b>         | <i>Currently being offered support</i>           | CURRENTSUPPORT | String        | Sec; Fe | 2021 |  |
|  |                                                | <i>Previously been offered support</i>           | PREVSUPPORT    |               |         |      |  |
|  |                                                | <i>Not been offered support/been turned away</i> | NOSUPPORT      |               |         |      |  |
|  | <b>Regarding this support, was it helpful?</b> | <i>Changed mind before getting the support</i>   | CHANGEDMIND    | Sliding scale | Sec; Fe | 2021 |  |
|  |                                                | <i>Not helpful at all</i>                        | 0-12.5         |               |         |      |  |
|  |                                                | <i>Not helpful enough</i>                        | 12.6-37.5      |               |         |      |  |
|  |                                                | <i>Just about helpful enough</i>                 | 37.6-62.4      |               |         |      |  |
|  |                                                | <i>Quite helpful</i>                             | 62.5-87.4      |               |         |      |  |
|  |                                                | <i>Very helpful</i>                              | 87.5-100       |               |         |      |  |
|  | <b>Brother or sister</b>                       |                                                  | Y              |               |         |      |  |
|  | <b>Regarding this support, are you</b>         | <i>Currently being offered support</i>           | CURRENTSUPPORT | String        | Sec; Fe | 2021 |  |
|  |                                                | <i>Previously been offered support</i>           | PREVSUPPORT    |               |         |      |  |
|  |                                                | <i>Not been offered support/been turned away</i> | NOSUPPORT      |               |         |      |  |
|  | <b>Regarding this support, was it helpful?</b> | <i>Changed mind before getting the support</i>   | CHANGEDMIND    | Sliding scale | Sec; Fe | 2021 |  |
|  |                                                | <i>Not helpful at all</i>                        | 0-12.5         |               |         |      |  |
|  |                                                | <i>Not helpful enough</i>                        | 12.6-37.5      |               |         |      |  |
|  |                                                | <i>Just about helpful enough</i>                 | 37.6-62.4      |               |         |      |  |
|  |                                                | <i>Quite helpful</i>                             | 62.5-87.4      |               |         |      |  |
|  |                                                | <i>Very helpful</i>                              | 87.5-100       |               |         |      |  |
|  | <b>Someone else in your family</b>             |                                                  | Y              |               |         |      |  |
|  | <b>Regarding this support, are you</b>         |                                                  | CURRENTSUPPORT | String        | Sec; Fe | 2021 |  |
|  |                                                |                                                  | PREVSUPPORT    |               |         |      |  |
|  |                                                |                                                  | NOSUPPORT      |               |         |      |  |
|  |                                                |                                                  | CHANGEDMIND    |               |         |      |  |
|  | <b>Regarding this support, was it helpful?</b> | <i>Previously been offered support</i>           | PREVSUPPORT    | Sliding scale | Sec; Fe | 2021 |  |
|  |                                                | <i>Not been offered support/been turned away</i> | NOSUPPORT      |               |         |      |  |
|  |                                                | <i>Changed mind before getting the support</i>   | CHANGEDMIND    |               |         |      |  |
|  |                                                | <i>Not helpful at all</i>                        | 0-12.5         |               |         |      |  |
|  |                                                | <i>Not helpful enough</i>                        | 12.6-37.5      |               |         |      |  |
|  |                                                | <i>Just about helpful enough</i>                 | 37.6-62.4      |               |         |      |  |
|  |                                                | <i>Quite helpful</i>                             | 62.5-87.4      |               |         |      |  |

Note: A \* in the Matched or Year Included columns indicates that the Question or Label column contain differences in the \* indicated year or survey version

## OxWell 2021 FE

|  |                                                | Very helpful                                     | 87.5-100       |               |         |      |
|--|------------------------------------------------|--------------------------------------------------|----------------|---------------|---------|------|
|  | <b>Friend(s)</b>                               |                                                  |                |               |         |      |
|  | <b>Regarding this support, are you</b>         | <i>Currently being offered support</i>           | CURRENTSUPPORT | String        | Sec; Fe | 2021 |
|  |                                                | <i>Previously been offered support</i>           | PREVSUPPORT    |               |         |      |
|  |                                                | <i>Not been offered support/been turned away</i> | NOSUPPORT      |               |         |      |
|  | <b>Regarding this support, was it helpful?</b> | <i>Changed mind before getting the support</i>   | CHANGEDMIND    |               |         |      |
|  |                                                | <i>Not helpful at all</i>                        | 0-12.5         | Sliding scale | Sec; Fe | 2021 |
|  |                                                | <i>Not helpful enough</i>                        | 12.6-37.5      |               |         |      |
|  |                                                | <i>Just about helpful enough</i>                 | 37.6-62.4      |               |         |      |
|  |                                                | <i>Quite helpful</i>                             | 62.5-87.4      |               |         |      |
|  |                                                | <i>Very helpful</i>                              | 87.5-100       |               |         |      |
|  | <b>GP (family doctor)</b>                      |                                                  | Y              |               |         |      |
|  | <b>Regarding this support, are you</b>         | <i>Currently being offered support</i>           | CURRENTSUPPORT | String        | Sec; Fe | 2021 |
|  |                                                | <i>Previously been offered support</i>           | PREVSUPPORT    |               |         |      |
|  |                                                | <i>Not been offered support/been turned away</i> | NOSUPPORT      |               |         |      |
|  | <b>Regarding this support, was it helpful?</b> | <i>Changed mind before getting the support</i>   | CHANGEDMIND    |               |         |      |
|  |                                                | <i>Not helpful at all</i>                        | 0-12.5         | Sliding scale | Sec; Fe | 2021 |
|  |                                                | <i>Not helpful enough</i>                        | 12.6-37.5      |               |         |      |
|  |                                                | <i>Just about helpful enough</i>                 | 37.6-62.4      |               |         |      |
|  |                                                | <i>Quite helpful</i>                             | 62.5-87.4      |               |         |      |
|  |                                                | <i>Very helpful</i>                              | 87.5-100       |               |         |      |
|  | <b>Social Worker</b>                           |                                                  | Y              |               |         |      |
|  | <b>Regarding this support, are you</b>         | <i>Currently being offered support</i>           | CURRENTSUPPORT | String        | Sec; Fe | 2021 |
|  |                                                | <i>Previously been offered support</i>           | PREVSUPPORT    |               |         |      |
|  |                                                | <i>Not been offered support/been turned away</i> | NOSUPPORT      |               |         |      |
|  | <b>Regarding this support, was it helpful?</b> | <i>Changed mind before getting the support</i>   | CHANGEDMIND    |               |         |      |
|  |                                                | <i>Not helpful at all</i>                        | 0-12.5         | Sliding scale | Sec; Fe | 2021 |
|  |                                                | <i>Not helpful enough</i>                        | 12.6-37.5      |               |         |      |
|  |                                                | <i>Just about helpful enough</i>                 | 37.6-62.4      |               |         |      |
|  |                                                | <i>Quite helpful</i>                             | 62.5-87.4      |               |         |      |

Note: A \* in the *Matched* or *Year Included* columns indicates that the *Question* or *Label* column contain differences in the \* indicated year or survey version

## OxWell 2021 FE

|  |                                                                                                                      | Very helpful                                     | 87.5-100       |               |         |      |  |
|--|----------------------------------------------------------------------------------------------------------------------|--------------------------------------------------|----------------|---------------|---------|------|--|
|  | <b>School/college Nurse/Counsellor/Educational Mental health practitioner/other pastoral staff at school/college</b> |                                                  | Y              |               |         |      |  |
|  | <b>Regarding this support, are you</b>                                                                               | <i>Currently being offered support</i>           | CURRENTSUPPORT | String        | Sec; Fe | 2021 |  |
|  |                                                                                                                      | <i>Previously been offered support</i>           | PREVSUPPORT    |               |         |      |  |
|  |                                                                                                                      | <i>Not been offered support/been turned away</i> | NOSUPPORT      |               |         |      |  |
|  | <b>Regarding this support, was it helpful?</b>                                                                       | <i>Changed mind before getting the support</i>   | CHANGEDMIND    |               |         |      |  |
|  |                                                                                                                      | <i>Not helpful at all</i>                        | 0-12.5         | Sliding scale | Sec; Fe | 2021 |  |
|  |                                                                                                                      | <i>Not helpful enough</i>                        | 12.6-37.5      |               |         |      |  |
|  |                                                                                                                      | <i>Just about helpful enough</i>                 | 37.6-62.4      |               |         |      |  |
|  |                                                                                                                      | <i>Quite helpful</i>                             | 62.5-87.4      |               |         |      |  |
|  |                                                                                                                      | <i>Very helpful</i>                              | 87.5-100       |               |         |      |  |
|  | <b>Another adult at school/college</b>                                                                               |                                                  | Y              |               |         |      |  |
|  | <b>Regarding this support, are you</b>                                                                               | <i>Currently being offered support</i>           | CURRENTSUPPORT | String        | Sec; Fe | 2021 |  |
|  |                                                                                                                      | <i>Previously been offered support</i>           | PREVSUPPORT    |               |         |      |  |
|  |                                                                                                                      | <i>Not been offered support/been turned away</i> | NOSUPPORT      |               |         |      |  |
|  | <b>Regarding this support, was it helpful?</b>                                                                       | <i>Changed mind before getting the support</i>   | CHANGEDMIND    |               |         |      |  |
|  |                                                                                                                      | <i>Not helpful at all</i>                        | 0-12.5         | Sliding scale | Sec; Fe | 2021 |  |
|  |                                                                                                                      | <i>Not helpful enough</i>                        | 12.6-37.5      |               |         |      |  |
|  |                                                                                                                      | <i>Just about helpful enough</i>                 | 37.6-62.4      |               |         |      |  |
|  |                                                                                                                      | <i>Quite helpful</i>                             | 62.5-87.4      |               |         |      |  |
|  |                                                                                                                      | <i>Very helpful</i>                              | 87.5-100       |               |         |      |  |
|  | <b>A peer mentor at school/college</b>                                                                               |                                                  | Y              |               |         |      |  |
|  | <b>Regarding this support, are you</b>                                                                               | <i>Currently being offered support</i>           | CURRENTSUPPORT | String        | Sec; Fe | 2021 |  |
|  |                                                                                                                      | <i>Previously been offered support</i>           | PREVSUPPORT    |               |         |      |  |
|  |                                                                                                                      | <i>Not been offered support/been turned away</i> | NOSUPPORT      |               |         |      |  |
|  | <b>Regarding this support, was it helpful?</b>                                                                       | <i>Changed mind before getting the support</i>   | CHANGEDMIND    |               |         |      |  |
|  |                                                                                                                      | <i>Not helpful at all</i>                        | 0-12.5         | Sliding scale | Sec; Fe | 2021 |  |
|  |                                                                                                                      | <i>Not helpful enough</i>                        | 12.6-37.5      |               |         |      |  |
|  |                                                                                                                      | <i>Just about helpful enough</i>                 | 37.6-62.4      |               |         |      |  |

Note: A \* in the *Matched* or *Year Included* columns indicates that the *Question* or *Label* column contain differences in the \* indicated year or survey version

## OxWell 2021 FE

|  |                                                                                            |                                           |           |             |               |              |
|--|--------------------------------------------------------------------------------------------|-------------------------------------------|-----------|-------------|---------------|--------------|
|  |                                                                                            | Quite helpful                             | 62.5-87.4 |             |               |              |
|  |                                                                                            | Very helpful                              | 87.5-100  |             |               |              |
|  | <b>CAMHS (NHS Child and adolescent mental health services)</b>                             |                                           |           |             |               |              |
|  | <b>Regarding this support, are you</b>                                                     | Currently being offered support           | Y         | CURRENTS    | String        | Sec; Fe 2021 |
|  |                                                                                            | Previously been offered support           |           | UPPORT      |               |              |
|  |                                                                                            | Not been offered support/been turned away |           | PREVSUPPORT |               |              |
|  |                                                                                            | Changed mind before getting the support   |           | ORT         |               |              |
|  | <b>Regarding this support, was it helpful?</b>                                             | Not helpful at all                        |           | NOSUPPORT   |               |              |
|  |                                                                                            | Not helpful enough                        |           | CHANGEDMIND | Sliding scale | Sec; Fe 2021 |
|  |                                                                                            | Just about helpful enough                 |           | 0-12.5      |               |              |
|  |                                                                                            | Quite helpful                             |           | 12.6-37.5   |               |              |
|  |                                                                                            | Very helpful                              |           | 37.6-62.4   |               |              |
|  |                                                                                            |                                           |           | 62.5-87.4   |               |              |
|  |                                                                                            |                                           |           | 87.5-100    |               |              |
|  | <b>Support service given by charity</b>                                                    |                                           |           |             |               |              |
|  | <b>Regarding this support, are you</b>                                                     | Currently being offered support           | Y         | CURRENTS    | String        | Sec; Fe 2021 |
|  |                                                                                            | Previously been offered support           |           | UPPORT      |               |              |
|  |                                                                                            | Not been offered support/been turned away |           | PREVSUPPORT |               |              |
|  |                                                                                            | Changed mind before getting the support   |           | ORT         |               |              |
|  | <b>Regarding this support, was it helpful?</b>                                             | Not helpful at all                        |           | NOSUPPORT   |               |              |
|  |                                                                                            | Not helpful enough                        |           | CHANGEDMIND | Sliding scale | Sec; Fe 2021 |
|  |                                                                                            | Just about helpful enough                 |           | 0-12.5      |               |              |
|  |                                                                                            | Quite helpful                             |           | 12.6-37.5   |               |              |
|  |                                                                                            | Very helpful                              |           | 37.6-62.4   |               |              |
|  |                                                                                            |                                           |           | 62.5-87.4   |               |              |
|  |                                                                                            |                                           |           | 87.5-100    |               |              |
|  | <b>An adult outside of school/college (at a sport club, another parent, family friend)</b> |                                           |           |             |               |              |
|  | <b>Regarding this support, are you</b>                                                     | Currently being offered support           | Y         | CURRENTS    | String        | Sec; Fe 2021 |
|  |                                                                                            | Previously been offered support           |           | UPPORT      |               |              |
|  |                                                                                            | Not been offered support/been turned away |           | PREVSUPPORT |               |              |
|  |                                                                                            | Changed mind before getting the support   |           | ORT         |               |              |
|  | <b>Regarding this support, was it helpful?</b>                                             | Not helpful at all                        |           | NOSUPPORT   |               |              |
|  |                                                                                            | Not helpful enough                        |           | CHANGEDMIND | Sliding scale | Sec; Fe 2021 |
|  |                                                                                            |                                           |           | 0-12.5      |               |              |
|  |                                                                                            |                                           |           | 12.6-37.5   |               |              |

Note: A \* in the *Matched* or *Year Included* columns indicates that the *Question* or *Label* column contain differences in the \* indicated year or survey version

## OxWell 2021 FE

|  |                                                |                                                  |                |                         |         |      |
|--|------------------------------------------------|--------------------------------------------------|----------------|-------------------------|---------|------|
|  |                                                | <i>Just about helpful enough</i>                 | 37.6-62.4      |                         |         |      |
|  |                                                | <i>Quite helpful</i>                             | 62.5-87.4      |                         |         |      |
|  |                                                | <i>Very helpful</i>                              | 87.5-100       |                         |         |      |
|  | <b>A telephone/text helpline</b>               |                                                  |                |                         |         |      |
|  | <b>Regarding this support, are you</b>         | <i>Currently being offered support</i>           | CURRENTSUPPORT | String                  | Sec; Fe | 2021 |
|  |                                                | <i>Previously been offered support</i>           | PREVSUPPORT    |                         |         |      |
|  |                                                | <i>Not been offered support/been turned away</i> | NOSUPPORT      |                         |         |      |
|  | <b>Regarding this support, was it helpful?</b> | <i>Changed mind before getting the support</i>   | CHANGEDMIND    |                         |         |      |
|  |                                                | <i>Not helpful at all</i>                        | 0-12.5         | Sliding scale           | Sec; Fe | 2021 |
|  |                                                | <i>Not helpful enough</i>                        | 12.6-37.5      |                         |         |      |
|  |                                                | <i>Just about helpful enough</i>                 | 37.6-62.4      |                         |         |      |
|  |                                                | <i>Quite helpful</i>                             | 62.5-87.4      |                         |         |      |
|  |                                                | <i>Very helpful</i>                              | 87.5-100       |                         |         |      |
|  | <b>Website or online forum</b>                 |                                                  |                |                         |         |      |
|  | <b>Regarding this support, are you</b>         | <i>Currently being offered support</i>           | CURRENTSUPPORT | String                  | Sec; Fe | 2021 |
|  |                                                | <i>Previously been offered support</i>           | PREVSUPPORT    |                         |         |      |
|  |                                                | <i>Not been offered support/been turned away</i> | NOSUPPORT      |                         |         |      |
|  | <b>Regarding this support, was it helpful?</b> | <i>Changed mind before getting the support</i>   | CHANGEDMIND    |                         |         |      |
|  |                                                | <i>Not helpful at all</i>                        | 0-12.5         | Sliding scale           | Sec; Fe | 2021 |
|  |                                                | <i>Not helpful enough</i>                        | 12.6-37.5      |                         |         |      |
|  |                                                | <i>Just about helpful enough</i>                 | 37.6-62.4      |                         |         |      |
|  |                                                | <i>Quite helpful</i>                             | 62.5-87.4      |                         |         |      |
|  |                                                | <i>Very helpful</i>                              | 87.5-100       |                         |         |      |
|  | <b>Other</b>                                   |                                                  |                |                         |         |      |
|  | <b>Please enter</b>                            |                                                  |                |                         |         |      |
|  | <b>Regarding this support, are you</b>         | <i>Currently being offered support</i>           | CURRENTSUPPORT | Free text box<br>String | Sec; Fe | 2021 |
|  |                                                | <i>Previously been offered support</i>           | PREVSUPPORT    |                         |         |      |
|  |                                                | <i>Not been offered support/been turned away</i> | NOSUPPORT      |                         |         |      |
|  | <b>Regarding this support, was it helpful?</b> | <i>Changed mind before getting the support</i>   | CHANGEDMIND    |                         |         |      |
|  |                                                | <i>Not helpful at all</i>                        | 0-12.5         | Sliding scale           | Sec; Fe | 2021 |

Note: A \* in the *Matched* or *Year Included* columns indicates that the *Question* or *Label* column contain differences in the \* indicated year or survey version



## OxWell 2021 FE

|  |                                                                                                                      |                                                  |                |               |         |                   |
|--|----------------------------------------------------------------------------------------------------------------------|--------------------------------------------------|----------------|---------------|---------|-------------------|
|  |                                                                                                                      | <i>Not helpful enough</i>                        | 12.6-37.5      |               |         |                   |
|  |                                                                                                                      | <i>Just about helpful enough</i>                 | 37.6-62.4      |               |         |                   |
|  |                                                                                                                      | <i>Quite helpful</i>                             | 62.5-87.4      |               |         |                   |
|  |                                                                                                                      | <i>Very helpful</i>                              | 87.5-100       |               |         |                   |
|  | <b>None of these</b>                                                                                                 |                                                  |                | Y             |         |                   |
|  | <b>Have you ever come across any content related to self-harm online?</b>                                            | <i>Never</i>                                     | 0-12.5         | String        | Sec; FE | 2019, 2020, 2021  |
|  |                                                                                                                      | <i>Once or twice</i>                             | 12.6-37.5      |               |         |                   |
|  |                                                                                                                      | <i>A few times</i>                               | 37.6-62.4      |               |         |                   |
|  |                                                                                                                      | <i>Weekly</i>                                    | 62.5-87.4      |               |         |                   |
|  |                                                                                                                      | <i>Daily</i>                                     | 87.5-100       |               |         |                   |
|  | <b>Have you ever seriously thought about taking an overdose or trying to harm yourself but not actually done so?</b> | <i>No</i>                                        | NO             | String        | Sec; FE | 2019,2021         |
|  |                                                                                                                      | <i>Yes – last time was within the past month</i> | WITHINMNT<br>H |               |         |                   |
|  |                                                                                                                      | <i>Yes – last time was within the past year</i>  | WITHINYR       |               |         |                   |
|  |                                                                                                                      | <i>Yes – last time was more than a year ago</i>  | GTYR           |               |         |                   |
|  | <b>Have you ever told someone you were going to harm or kill yourself?</b>                                           | <i>Never</i>                                     | 0-12.5         | Sliding scale | Sec; FE | 2019, 2020, 2021  |
|  |                                                                                                                      | <i>Rarely</i>                                    | 12.6-37.5      |               |         |                   |
|  |                                                                                                                      | <i>Occasionally</i>                              | 37.6-62.4      |               |         |                   |
|  |                                                                                                                      | <i>Frequently</i>                                | 62.5-87.4      |               |         |                   |
|  |                                                                                                                      | <i>Always</i>                                    | 87.5-100       |               |         |                   |
|  | <b>Has anyone among your family or close friends died by suicide?</b>                                                | <i>No</i>                                        | N              | String        | Sec; FE | 2019, 2020, 2021* |
|  |                                                                                                                      | <i>Yes – in the past 12 months</i>               | YLAST12        |               |         |                   |
|  |                                                                                                                      | <i>Yes – more than a year ago</i>                | YGTYR          |               |         |                   |
|  | <b>Has anyone among your family attempted suicide or tried to harm themselves?</b>                                   | <i>No</i>                                        | N              | String        | Sec; FE | 2019, 2020, 2021* |
|  |                                                                                                                      | <i>Yes – in the past 12 months</i>               | YLAST12        |               |         |                   |
|  |                                                                                                                      | <i>Yes – more than a year ago</i>                | YGTYR          |               |         |                   |
|  | <b>Has anyone among your close friends attempted suicide or tried to harm themselves?</b>                            | <i>No</i>                                        | N              | String        | Sec; FE | 2019, 2020, 2021* |
|  |                                                                                                                      | <i>Yes – in the past 12 months</i>               | YLAST12        |               |         |                   |
|  |                                                                                                                      | <i>Yes – more than a year ago</i>                | YGTYR          |               |         |                   |

Note: A \* in the *Matched* or *Year Included* columns indicates that the *Question* or *Label* column contain differences in the \* indicated year or survey version

## OxWell 2021 FE

**MENTAL HEALTH**

| CODE | Contingent | Question                                                    | Label                   | Value     | Type          | Matched           | Year Included       |
|------|------------|-------------------------------------------------------------|-------------------------|-----------|---------------|-------------------|---------------------|
|      |            | <b><i>I've been feeling optimistic about the future</i></b> | <i>None of the time</i> | 0-12.5    | Sliding scale | Prim*;<br>Sec; FE | 2019; 2020;<br>2021 |
|      |            |                                                             | <i>Rarely</i>           | 12.6-37.5 |               |                   |                     |
|      |            |                                                             | <i>Some of the time</i> | 37.6-62.4 |               |                   |                     |
|      |            |                                                             | <i>Often</i>            | 62.5-87.4 |               |                   |                     |
|      |            |                                                             | <i>All of the time</i>  | 87.5-100  |               |                   |                     |
|      |            | <b><i>I've been feeling useful</i></b>                      | <i>None of the time</i> | 0-12.5    | Sliding scale | Prim; Sec;<br>FE  | 2019; 2020;<br>2021 |
|      |            |                                                             | <i>Rarely</i>           | 12.6-37.5 |               |                   |                     |
|      |            |                                                             | <i>Some of the time</i> | 37.6-62.4 |               |                   |                     |
|      |            |                                                             | <i>Often</i>            | 62.5-87.4 |               |                   |                     |
|      |            |                                                             | <i>All of the time</i>  | 87.5-100  |               |                   |                     |
|      |            | <b><i>I've been feeling relaxed</i></b>                     | <i>None of the time</i> | 0-12.5    | Sliding scale | Prim; Sec;<br>FE  | 2019; 2020;<br>2021 |
|      |            |                                                             | <i>Rarely</i>           | 12.6-37.5 |               |                   |                     |
|      |            |                                                             | <i>Some of the time</i> | 37.6-62.4 |               |                   |                     |
|      |            |                                                             | <i>Often</i>            | 62.5-87.4 |               |                   |                     |
|      |            |                                                             | <i>All of the time</i>  | 87.5-100  |               |                   |                     |
|      |            | <b><i>I've been feeling interested in other people</i></b>  | <i>None of the time</i> | 0-12.5    | Sliding scale | Prim; Sec;<br>FE  | 2019; 2020;<br>2021 |
|      |            |                                                             | <i>Rarely</i>           | 12.6-37.5 |               |                   |                     |
|      |            |                                                             | <i>Some of the time</i> | 37.6-62.4 |               |                   |                     |
|      |            |                                                             | <i>Often</i>            | 62.5-87.4 |               |                   |                     |
|      |            |                                                             | <i>All of the time</i>  | 87.5-100  |               |                   |                     |
|      |            | <b><i>I've had energy to spare</i></b>                      | <i>None of the time</i> | 0-12.5    | Sliding scale | Prim; Sec;<br>FE  | 2019; 2020;<br>2021 |
|      |            |                                                             | <i>Rarely</i>           | 12.6-37.5 |               |                   |                     |
|      |            |                                                             | <i>Some of the time</i> | 37.6-62.4 |               |                   |                     |
|      |            |                                                             | <i>Often</i>            | 62.5-87.4 |               |                   |                     |
|      |            |                                                             | <i>All of the time</i>  | 87.5-100  |               |                   |                     |
|      |            | <b><i>I've been dealing with problems well</i></b>          | <i>None of the time</i> | 0-12.5    | Sliding scale | Prim; Sec;<br>FE  | 2019; 2020;<br>2021 |
|      |            |                                                             | <i>Rarely</i>           | 12.6-37.5 |               |                   |                     |
|      |            |                                                             | <i>Some of the time</i> | 37.6-62.4 |               |                   |                     |
|      |            |                                                             | <i>Often</i>            | 62.5-87.4 |               |                   |                     |
|      |            |                                                             | <i>All of the time</i>  | 87.5-100  |               |                   |                     |
|      |            | <b><i>I've been thinking clearly</i></b>                    | <i>None of the time</i> | 0-12.5    | Sliding scale | Prim; Sec;<br>FE  | 2019; 2020;<br>2021 |
|      |            |                                                             | <i>Rarely</i>           | 12.6-37.5 |               |                   |                     |
|      |            |                                                             | <i>Some of the time</i> | 37.6-62.4 |               |                   |                     |

Note: A \* in the *Matched* or *Year Included* columns indicates that the *Question* or *Label* column contain differences in the \* indicated year or survey version

## OxWell 2021 FE

|  |                                                                  |                         |           |               |               |                  |
|--|------------------------------------------------------------------|-------------------------|-----------|---------------|---------------|------------------|
|  |                                                                  | <i>Often</i>            | 62.5-87.4 |               |               |                  |
|  |                                                                  | <i>All of the time</i>  | 87.5-100  |               |               |                  |
|  | <b><i>I've been feeling good about myself</i></b>                | <i>None of the time</i> | 0-12.5    | Sliding scale | Prim; Sec; FE | 2019; 2020; 2021 |
|  |                                                                  | <i>Rarely</i>           | 12.6-37.5 |               |               |                  |
|  |                                                                  | <i>Some of the time</i> | 37.6-62.4 |               |               |                  |
|  |                                                                  | <i>Often</i>            | 62.5-87.4 |               |               |                  |
|  |                                                                  | <i>All of the time</i>  | 87.5-100  |               |               |                  |
|  | <b><i>I've been feeling confident</i></b>                        | <i>None of the time</i> | 0-12.5    | Sliding scale | Prim; Sec; FE | 2019; 2020; 2021 |
|  |                                                                  | <i>Rarely</i>           | 12.6-37.5 |               |               |                  |
|  |                                                                  | <i>Some of the time</i> | 37.6-62.4 |               |               |                  |
|  |                                                                  | <i>Often</i>            | 62.5-87.4 |               |               |                  |
|  |                                                                  | <i>All of the time</i>  | 87.5-100  |               |               |                  |
|  | <b><i>I've been able to make my own mind up about things</i></b> | <i>None of the time</i> | 0-12.5    | Sliding scale | Prim; Sec; FE | 2019; 2020; 2021 |
|  |                                                                  | <i>Rarely</i>           | 12.6-37.5 |               |               |                  |
|  |                                                                  | <i>Some of the time</i> | 37.6-62.4 |               |               |                  |
|  |                                                                  | <i>Often</i>            | 62.5-87.4 |               |               |                  |
|  |                                                                  | <i>All of the time</i>  | 87.5-100  |               |               |                  |
|  | <b><i>I've been feeling loved</i></b>                            | <i>None of the time</i> | 0-12.5    | Sliding scale | Prim; Sec; FE | 2019; 2020; 2021 |
|  |                                                                  | <i>Rarely</i>           | 12.6-37.5 |               |               |                  |
|  |                                                                  | <i>Some of the time</i> | 37.6-62.4 |               |               |                  |
|  |                                                                  | <i>Often</i>            | 62.5-87.4 |               |               |                  |
|  |                                                                  | <i>All of the time</i>  | 87.5-100  |               |               |                  |
|  | <b><i>I've been interested in new things</i></b>                 | <i>None of the time</i> | 0-12.5    | Sliding scale | Prim; Sec; FE | 2019; 2020; 2021 |
|  |                                                                  | <i>Rarely</i>           | 12.6-37.5 |               |               |                  |
|  |                                                                  | <i>Some of the time</i> | 37.6-62.4 |               |               |                  |
|  |                                                                  | <i>Often</i>            | 62.5-87.4 |               |               |                  |
|  |                                                                  | <i>All of the time</i>  | 87.5-100  |               |               |                  |
|  | <b><i>I've been feeling cheerful</i></b>                         | <i>None of the time</i> | 0-12.5    | Sliding scale | Prim; Sec; FE | 2019; 2020; 2021 |
|  |                                                                  | <i>Rarely</i>           | 12.6-37.5 |               |               |                  |
|  |                                                                  | <i>Some of the time</i> | 37.6-62.4 |               |               |                  |
|  |                                                                  | <i>Often</i>            | 62.5-87.4 |               |               |                  |
|  |                                                                  | <i>All of the time</i>  | 87.5-100  |               |               |                  |
|  | <b><i>I've been feeling close to other people</i></b>            | <i>None of the time</i> | 0-12.5    | Sliding scale | Prim; Sec; FE | 2019; 2020; 2021 |
|  |                                                                  | <i>Rarely</i>           | 12.6-37.5 |               |               |                  |
|  |                                                                  | <i>Some of the time</i> | 37.6-62.4 |               |               |                  |

Note: A \* in the *Matched* or *Year Included* columns indicates that the *Question* or *Label* column contain differences in the \* indicated year or survey version

## OxWell 2021 FE

|  |                                                                                                                   |                        |           |        |         |            |
|--|-------------------------------------------------------------------------------------------------------------------|------------------------|-----------|--------|---------|------------|
|  |                                                                                                                   | <i>Often</i>           | 62.5-87.4 |        |         |            |
|  |                                                                                                                   | <i>All of the time</i> | 87.5-100  |        |         |            |
|  | <b><i>I feel sad or empty</i></b>                                                                                 | <i>Never</i>           | NEVER     | String | Sec; FE | 2020; 2021 |
|  |                                                                                                                   | <i>Sometimes</i>       | SOMETIMES |        |         |            |
|  |                                                                                                                   | <i>Often</i>           | OFTEN     |        |         |            |
|  |                                                                                                                   | <i>Always</i>          | ALWAYS    |        |         |            |
|  | <b><i>I worry when I think I have done poorly at something</i></b>                                                | <i>Never</i>           | NEVER     | String | Sec; FE | 2020; 2021 |
|  |                                                                                                                   | <i>Sometimes</i>       | SOMETIMES |        |         |            |
|  |                                                                                                                   | <i>Often</i>           | OFTEN     |        |         |            |
|  |                                                                                                                   | <i>Always</i>          | ALWAYS    |        |         |            |
|  | <b><i>I would feel afraid of being on my own at home</i></b>                                                      | <i>Never</i>           | NEVER     | String | Sec; FE | 2020; 2021 |
|  |                                                                                                                   | <i>Sometimes</i>       | SOMETIMES |        |         |            |
|  |                                                                                                                   | <i>Often</i>           | OFTEN     |        |         |            |
|  |                                                                                                                   | <i>Always</i>          | ALWAYS    |        |         |            |
|  | <b><i>Nothing is much fun anymore</i></b>                                                                         | <i>Never</i>           | NEVER     | String | Sec; FE | 2020; 2021 |
|  |                                                                                                                   | <i>Sometimes</i>       | SOMETIMES |        |         |            |
|  |                                                                                                                   | <i>Often</i>           | OFTEN     |        |         |            |
|  |                                                                                                                   | <i>Always</i>          | ALWAYS    |        |         |            |
|  | <b><i>I worry that something awful will happen to someone in my family</i></b>                                    | <i>Never</i>           | NEVER     | String | Sec; FE | 2020; 2021 |
|  |                                                                                                                   | <i>Sometimes</i>       | SOMETIMES |        |         |            |
|  |                                                                                                                   | <i>Often</i>           | OFTEN     |        |         |            |
|  |                                                                                                                   | <i>Always</i>          | ALWAYS    |        |         |            |
|  | <b><i>I am afraid of being in crowded places (like shopping centres, the movies, buses, busy playgrounds)</i></b> | <i>Never</i>           | NEVER     | String | Sec; FE | 2020; 2021 |
|  |                                                                                                                   | <i>Sometimes</i>       | SOMETIMES |        |         |            |
|  |                                                                                                                   | <i>Often</i>           | OFTEN     |        |         |            |
|  |                                                                                                                   | <i>Always</i>          | ALWAYS    |        |         |            |
|  | <b><i>I worry what other people think of me</i></b>                                                               | <i>Never</i>           | NEVER     | String | Sec; FE | 2020; 2021 |
|  |                                                                                                                   | <i>Sometimes</i>       | SOMETIMES |        |         |            |
|  |                                                                                                                   | <i>Often</i>           | OFTEN     |        |         |            |
|  |                                                                                                                   | <i>Always</i>          | ALWAYS    |        |         |            |
|  | <b><i>I have trouble sleeping</i></b>                                                                             | <i>Never</i>           | NEVER     | String | Sec; FE | 2020; 2021 |
|  |                                                                                                                   | <i>Sometimes</i>       | SOMETIMES |        |         |            |
|  |                                                                                                                   | <i>Often</i>           | OFTEN     |        |         |            |
|  |                                                                                                                   | <i>Always</i>          | ALWAYS    |        |         |            |

Note: A \* in the *Matched* or *Year Included* columns indicates that the *Question* or *Label* column contain differences in the \* indicated year or survey version

## OxWell 2021 FE

|  |                                                                                                                                   |                                       |                                       |        |         |            |
|--|-----------------------------------------------------------------------------------------------------------------------------------|---------------------------------------|---------------------------------------|--------|---------|------------|
|  | <b><i>I feel scared if I have to sleep on my own</i></b>                                                                          | Never<br>Sometimes<br>Often<br>Always | NEVER<br>SOMETIMES<br>OFTEN<br>ALWAYS | String | Sec; FE | 2020; 2021 |
|  | <b><i>I have problems with my appetite</i></b>                                                                                    | Never<br>Sometimes<br>Often<br>Always | NEVER<br>SOMETIMES<br>OFTEN<br>ALWAYS | String | Sec; FE | 2020; 2021 |
|  | <b><i>I suddenly become dizzy or faint when there is no reason for this</i></b>                                                   | Never<br>Sometimes<br>Often<br>Always | NEVER<br>SOMETIMES<br>OFTEN<br>ALWAYS | String | Sec; FE | 2020; 2021 |
|  | <b><i>I have to do some things over and over again (like washing my hands, cleaning or putting things in a certain order)</i></b> | Never<br>Sometimes<br>Often<br>Always | NEVER<br>SOMETIMES<br>OFTEN<br>ALWAYS | String | Sec; FE | 2020; 2021 |
|  | <b><i>I have no energy for things</i></b>                                                                                         | Never<br>Sometimes<br>Often<br>Always | NEVER<br>SOMETIMES<br>OFTEN<br>ALWAYS | String | Sec; FE | 2020; 2021 |
|  | <b><i>I suddenly start to tremble or shake when there is no reason for this</i></b>                                               | Never<br>Sometimes<br>Often<br>Always | NEVER<br>SOMETIMES<br>OFTEN<br>ALWAYS | String | Sec; FE | 2020; 2021 |
|  | <b><i>I cannot think clearly</i></b>                                                                                              | Never<br>Sometimes<br>Often<br>Always | NEVER<br>SOMETIMES<br>OFTEN<br>ALWAYS | String | Sec; FE | 2020; 2021 |
|  | <b><i>I feel worthless</i></b>                                                                                                    | Never<br>Sometimes<br>Often<br>Always | NEVER<br>SOMETIMES<br>OFTEN<br>ALWAYS | String | Sec; FE | 2020; 2021 |
|  |                                                                                                                                   | Never                                 | NEVER                                 | String | Sec; FE | 2020; 2021 |

Note: A \* in the *Matched* or *Year Included* columns indicates that the *Question* or *Label* column contain differences in the \* indicated year or survey version

## OxWell 2021 FE

|  |                                                                                                              |                                       |                                       |        |         |            |
|--|--------------------------------------------------------------------------------------------------------------|---------------------------------------|---------------------------------------|--------|---------|------------|
|  | <b><i>I have to think of special thoughts (like numbers or words) to stop bad things from happening.</i></b> | Sometimes<br>Often<br>Always          | SOMETIMES<br>OFTEN<br>ALWAYS          |        |         |            |
|  | <b><i>I think about death</i></b>                                                                            | Never<br>Sometimes<br>Often<br>Always | NEVER<br>SOMETIMES<br>OFTEN<br>ALWAYS | String | Sec; FE | 2020; 2021 |
|  | <b><i>I feel like I don't want to move</i></b>                                                               | Never<br>Sometimes<br>Often<br>Always | NEVER<br>SOMETIMES<br>OFTEN<br>ALWAYS | String | Sec; FE | 2020; 2021 |
|  | <b><i>I worry that I will suddenly get a scared feeling when there is nothing to be afraid of</i></b>        | Never<br>Sometimes<br>Often<br>Always | NEVER<br>SOMETIMES<br>OFTEN<br>ALWAYS | String | Sec; FE | 2020; 2021 |
|  | <b><i>I am tired a lot</i></b>                                                                               | Never<br>Sometimes<br>Often<br>Always | NEVER<br>SOMETIMES<br>OFTEN<br>ALWAYS | String | Sec; FE | 2020; 2021 |
|  | <b><i>I feel afraid that I will make a fool of myself in front of people</i></b>                             | Never<br>Sometimes<br>Often<br>Always | NEVER<br>SOMETIMES<br>OFTEN<br>ALWAYS | String | Sec; FE | 2020; 2021 |
|  | <b><i>I have to do some things in just the right way to stop bad things from happening</i></b>               | Never<br>Sometimes<br>Often<br>Always | NEVER<br>SOMETIMES<br>OFTEN<br>ALWAYS | String | Sec; FE | 2020; 2021 |
|  | <b><i>I feel restless</i></b>                                                                                | Never<br>Sometimes<br>Often<br>Always | NEVER<br>SOMETIMES<br>OFTEN<br>ALWAYS | String | Sec; FE | 2020; 2021 |
|  | <b><i>I worry that something bad will happen to me</i></b>                                                   | Never<br>Sometimes<br>Often           | NEVER<br>SOMETIMES<br>OFTEN           | String | Sec; FE | 2020; 2021 |

Note: A \* in the Matched or Year Included columns indicates that the Question or Label column contain differences in the \* indicated year or survey version

## OxWell 2021 FE

|                                                                                       | <i>Always</i>                            | ALWAYS    |               |                |                  |
|---------------------------------------------------------------------------------------|------------------------------------------|-----------|---------------|----------------|------------------|
| <b>Overall, are you basically satisfied with your life?</b>                           | <i>Unsatisfied most of the time</i>      | 0-12.5    | Sliding scale | Prim; Sec; FE  | 2019; 2020; 2021 |
|                                                                                       | <i>Quite unsatisfied</i>                 | 12.6-37.5 |               |                |                  |
|                                                                                       | <i>Neither satisfied nor unsatisfied</i> | 37.6-62.4 |               |                |                  |
|                                                                                       | <i>Quite satisfied</i>                   | 62.5-87.4 |               |                |                  |
|                                                                                       | <i>Satisfied</i>                         | 87.5-100  |               |                |                  |
| <b>How often have you been so worried about something you can not sleep at night?</b> | <i>Never</i>                             | 0-12.5    | Sliding scale | Prim; Sec; FE  | 2019; 2020; 2021 |
|                                                                                       | <i>Once or twice</i>                     | 12.6-37.5 |               |                |                  |
|                                                                                       | <i>Sometimes</i>                         | 37.6-62.4 |               |                |                  |
|                                                                                       | <i>Most nights</i>                       | 62.5-87.4 |               |                |                  |
|                                                                                       | <i>Every night</i>                       | 87.5-100  |               |                |                  |
| <b>Overall, how confident about your future do you generally feel?</b>                | Not at all confident                     | 0-12.5    | Sliding scale | Prim ; Sec; FE | 2019;2021        |
|                                                                                       | Not very confident                       | 12.6-37.5 |               |                |                  |
|                                                                                       | Quite confident                          | 37.6-62.4 |               |                |                  |
|                                                                                       | Confident                                | 62.5-87.4 |               |                |                  |
|                                                                                       | Extremely confident                      | 87.5-100  |               |                |                  |
| <b>How proud do you feel of things you have achieved in your life?</b>                | Not at all                               | 0-12.5    | Sliding scale | Prim ; Sec; FE | 2019; 2021       |
|                                                                                       | Not very                                 | 12.6-37.5 |               |                |                  |
|                                                                                       | A bit                                    | 37.6-62.4 |               |                |                  |
|                                                                                       | Quite                                    | 62.5-87.4 |               |                |                  |
|                                                                                       | Extremely                                | 87.5-100  |               |                |                  |

Note: A \* in the *Matched* or *Year Included* columns indicates that the *Question* or *Label* column contain differences in the \* indicated year or survey version

OxWell 2021 FE

**ADVERSE CHILDHOOD EXPERIENCES**

| CODE | Contingent | Question                                                                                                                                                                                                                                                                                                                                                                                                                                                                                                                                                                                                                                                                                                                                                                                                                                                                                                                                                                                                                                                                                                                                                                                                                                                                                                                                                                                                                                                                                                                                                     | Label                        | Value  | Type    | Matched | Year Included    |
|------|------------|--------------------------------------------------------------------------------------------------------------------------------------------------------------------------------------------------------------------------------------------------------------------------------------------------------------------------------------------------------------------------------------------------------------------------------------------------------------------------------------------------------------------------------------------------------------------------------------------------------------------------------------------------------------------------------------------------------------------------------------------------------------------------------------------------------------------------------------------------------------------------------------------------------------------------------------------------------------------------------------------------------------------------------------------------------------------------------------------------------------------------------------------------------------------------------------------------------------------------------------------------------------------------------------------------------------------------------------------------------------------------------------------------------------------------------------------------------------------------------------------------------------------------------------------------------------|------------------------------|--------|---------|---------|------------------|
|      |            | <p><b>Many young people experience stressful life events that can affect their health and wellbeing</b></p> <p><b>Please read the 10 statements below. Count the number of statements that apply to you and select that number in the drop down box.</b></p> <p><b>At any point since you were born...</b></p> <ol style="list-style-type: none"> <li>1. <b>Your parents or guardians were separated or divorced</b></li> <li>2. <b>You lived with a household member who served time in jail or prison</b></li> <li>3. <b>You lived with a household member who was depressed, mentally unwell or attempted suicide</b></li> <li>4. <b>You saw or heard household members hurt or threaten to hurt each other</b></li> <li>5. <b>A household member swore at, insulted, humiliated, or put you down in a way that scared you OR a household member acted in a way that made you afraid that you might be physically hurt</b></li> <li>6. <b>Someone touched your private parts or asked you to touch their private parts in a sexual way that was unwanted, against your will, or made you feel uncomfortable</b></li> <li>7. <b>More than once, you went without food, clothing, a place to live, or had no one to protect you</b></li> <li>8. <b>Someone pushed, grabbed, slapped or threw something at you OR you were hit so hard that you were injured or had marks</b></li> <li>9. <b>You lived with someone who had a problem with drinking or using drugs</b></li> <li>10. <b>You often felt unsupported, unloved and/or unprotected</b></li> </ol> | <i>Number of experiences</i> | 1 - 10 | Numeric | FE      | 2019: 2020; 2021 |

Note: A \* in the *Matched* or *Year Included* columns indicates that the *Question* or *Label* column contain differences in the \* indicated year or survey version



OxWell 2021 FE

**MENTAL HEALTH SERVICES**

| CODE | Contingent | Question                                                                                                                                      | Label                                                                               | Value                                                     | Type          | Matched           | Year Included            |
|------|------------|-----------------------------------------------------------------------------------------------------------------------------------------------|-------------------------------------------------------------------------------------|-----------------------------------------------------------|---------------|-------------------|--------------------------|
|      |            | <b>Have you ever felt you had a mental health problem</b>                                                                                     | Yes<br>No                                                                           | Y<br>N                                                    | String        | Sec; FE           | 2021                     |
|      |            | <b>Do you know who provides Mental Health support in your school/college (where to go when you are worried and want to talk to an adult)?</b> | Yes<br>No<br>Not sure                                                               | Y<br>N<br>D                                               | String        | Prim*;<br>Sec; FE | 2019*;<br>2020;<br>2021* |
|      |            | <b>Who provides mental health support in your school/college?</b>                                                                             |                                                                                     |                                                           | Tick box      | Prim*;<br>Sec; FE | 2021                     |
|      |            |                                                                                                                                               | Education Mental Health Practitioner (EMHP)                                         | Y                                                         |               |                   |                          |
|      |            |                                                                                                                                               | School/college nurse                                                                | Y                                                         |               |                   |                          |
|      |            |                                                                                                                                               | Other mental health workers who visit the school/college (for example, a charity)   | Y                                                         |               |                   |                          |
|      |            |                                                                                                                                               | School/college counsellor/psychologist                                              | Y                                                         |               |                   |                          |
|      |            |                                                                                                                                               | Class teacher/lecturer                                                              | Y                                                         |               |                   |                          |
|      |            |                                                                                                                                               | Head of year                                                                        | Y                                                         |               |                   |                          |
|      |            |                                                                                                                                               | Teaching assistants                                                                 | Y                                                         |               |                   |                          |
|      |            |                                                                                                                                               | SENCO                                                                               | Y                                                         |               |                   |                          |
|      |            |                                                                                                                                               | Peer mentor                                                                         | Y                                                         |               |                   |                          |
|      |            |                                                                                                                                               | Other adult in school/college                                                       | Y                                                         |               |                   |                          |
|      |            | <b>Is it easy to access mental health support at school/college</b>                                                                           | Very difficult<br>Quite difficult<br>Sometimes difficult<br>Quite easy<br>Very easy | 0-12.5<br>12.6-37.5<br>37.6-62.4<br>62.5-87.4<br>87.5-100 | Sliding scale | Prim*;<br>Sec; FE | 2020; 2021               |
|      |            | <b>Have you ever tried to ask for support for a mental health problem from the following:</b>                                                 |                                                                                     |                                                           |               |                   |                          |
|      |            | <b>Parent, step-parent or carer</b>                                                                                                           |                                                                                     | Y                                                         |               |                   |                          |
|      |            | <b>Regarding this support, are you</b>                                                                                                        | Currently being offered support<br>Previously been offered support                  | CURRENTSUPPORT<br>PREVSUPPORT                             | String        | Sec; Fe           | 2021                     |

Note: A \* in the Matched or Year Included columns indicates that the Question or Label column contain differences in the \* indicated year or survey version

## OxWell 2021 FE

|  |                                                |                                                  |                |               |         |      |  |
|--|------------------------------------------------|--------------------------------------------------|----------------|---------------|---------|------|--|
|  |                                                | <i>Not been offered support/been turned away</i> | NOSUPPORT      |               |         |      |  |
|  | <b>Regarding this support, was it helpful?</b> | <i>Changed mind before getting the support</i>   | CHANGEDMIND    |               |         |      |  |
|  |                                                | <i>Not helpful at all</i>                        | 0-12.5         | Sliding scale | Sec; Fe | 2021 |  |
|  |                                                | <i>Not helpful enough</i>                        | 12.6-37.5      |               |         |      |  |
|  |                                                | <i>Just about helpful enough</i>                 | 37.6-62.4      |               |         |      |  |
|  |                                                | <i>Quite helpful</i>                             | 62.5-87.4      |               |         |      |  |
|  |                                                | <i>Very helpful</i>                              | 87.5-100       |               |         |      |  |
|  | <b>Brother or sister</b>                       |                                                  | Y              |               |         |      |  |
|  | <b>Regarding this support, was it helpful?</b> |                                                  | CURRENTSUPPORT | String        | Sec; Fe | 2021 |  |
|  |                                                |                                                  | PREVSUPPORT    |               |         |      |  |
|  |                                                |                                                  | NOSUPPORT      |               |         |      |  |
|  |                                                |                                                  | CHANGEDMIND    |               |         |      |  |
|  | <b>Regarding this support, was it helpful?</b> | <i>Previously been offered support</i>           | PREVSUPPORT    |               |         |      |  |
|  |                                                | <i>Not been offered support/been turned away</i> | NOSUPPORT      |               |         |      |  |
|  |                                                | <i>Changed mind before getting the support</i>   | CHANGEDMIND    |               |         |      |  |
|  |                                                | <i>Not helpful at all</i>                        | 0-12.5         | Sliding scale | Sec; Fe | 2021 |  |
|  |                                                | <i>Not helpful enough</i>                        | 12.6-37.5      |               |         |      |  |
|  |                                                | <i>Just about helpful enough</i>                 | 37.6-62.4      |               |         |      |  |
|  |                                                | <i>Quite helpful</i>                             | 62.5-87.4      |               |         |      |  |
|  |                                                | <i>Very helpful</i>                              | 87.5-100       |               |         |      |  |
|  | <b>Someone else in your family</b>             |                                                  | Y              |               |         |      |  |
|  | <b>Regarding this support, are you</b>         | <i>Currently being offered support</i>           | CURRENTSUPPORT | String        | Sec; Fe | 2021 |  |
|  |                                                | <i>Previously been offered support</i>           | PREVSUPPORT    |               |         |      |  |
|  |                                                | <i>Not been offered support/been turned away</i> | NOSUPPORT      |               |         |      |  |
|  |                                                | <i>Changed mind before getting the support</i>   | CHANGEDMIND    |               |         |      |  |
|  | <b>Regarding this support, was it helpful?</b> | <i>Not helpful at all</i>                        | 0-12.5         | Sliding scale | Sec; Fe | 2021 |  |
|  |                                                | <i>Not helpful enough</i>                        | 12.6-37.5      |               |         |      |  |
|  |                                                | <i>Just about helpful enough</i>                 | 37.6-62.4      |               |         |      |  |
|  |                                                | <i>Quite helpful</i>                             | 62.5-87.4      |               |         |      |  |
|  |                                                | <i>Very helpful</i>                              | 87.5-100       |               |         |      |  |

Note: A \* in the *Matched* or *Year Included* columns indicates that the *Question* or *Label* column contain differences in the \* indicated year or survey version

## OxWell 2021 FE

|  |                                                |                                                                                                                                                                                                                                                                      |                                                                                                           |               |         |      |
|--|------------------------------------------------|----------------------------------------------------------------------------------------------------------------------------------------------------------------------------------------------------------------------------------------------------------------------|-----------------------------------------------------------------------------------------------------------|---------------|---------|------|
|  | <b>Friend(s)</b>                               |                                                                                                                                                                                                                                                                      | Y                                                                                                         |               |         |      |
|  | <b>Regarding this support, are you</b>         | CURRENTSUPPORT<br>PREVSUPPORT<br>NOSUPPORT<br>CHANGEDMIND                                                                                                                                                                                                            |                                                                                                           | String        | Sec; Fe | 2021 |
|  | <b>Regarding this support, was it helpful?</b> | Previously been offered support<br>Not been offered support/been turned away<br>Changed mind before getting the support<br>Not helpful at all<br>Not helpful enough<br>Just about helpful enough<br>Quite helpful<br>Very helpful                                    | PREVSUPPORT<br>NOSUPPORT<br>T<br>CHANGEDMIND<br>0-12.5<br>12.6-37.5<br>37.6-62.4<br>62.5-87.4<br>87.5-100 | Sliding scale | Sec; Fe | 2021 |
|  | <b>GP (family doctor)</b>                      |                                                                                                                                                                                                                                                                      | Y                                                                                                         |               |         |      |
|  | <b>Regarding this support, are you</b>         | Currently being offered support<br>Previously been offered support<br>Not been offered support/been turned away<br>Changed mind before getting the support<br>Not helpful at all<br>Not helpful enough<br>Just about helpful enough<br>Quite helpful<br>Very helpful | CURRENTSUPPORT<br>PREVSUPPORT<br>NOSUPPORT<br>T<br>CHANGEDMIND<br>37.6-62.4<br>62.5-87.4<br>87.5-100      | String        | Sec; Fe | 2021 |
|  | <b>Regarding this support, was it helpful?</b> |                                                                                                                                                                                                                                                                      |                                                                                                           | Sliding scale | Sec; Fe | 2021 |
|  | <b>Social Worker</b>                           |                                                                                                                                                                                                                                                                      | Y                                                                                                         |               |         |      |
|  | <b>Regarding this support, are you</b>         | Currently being offered support<br>Previously been offered support<br>Not been offered support/been turned away<br>Changed mind before getting the support                                                                                                           | CURRENTSUPPORT<br>PREVSUPPORT<br>NOSUPPORT<br>T<br>CHANGEDMIND                                            | String        | Sec; Fe | 2021 |

Note: A \* in the Matched or Year Included columns indicates that the Question or Label column contain differences in the \* indicated year or survey version

## OxWell 2021 FE

|  |                                                                                                                                                                |                                                                                                                                                                                        |                                                                |               |         |      |
|--|----------------------------------------------------------------------------------------------------------------------------------------------------------------|----------------------------------------------------------------------------------------------------------------------------------------------------------------------------------------|----------------------------------------------------------------|---------------|---------|------|
|  | <b>Regarding this support, was it helpful?</b>                                                                                                                 | <i>Not helpful at all</i><br><i>Not helpful enough</i><br><i>Just about helpful enough</i><br><i>Quite helpful</i><br><i>Very helpful</i>                                              | 0-12.5<br>12.6-37.5<br>37.6-62.4<br>62.5-87.4<br>87.5-100      | Sliding scale | Sec; Fe | 2021 |
|  | <b>School/college Nurse/Counsellor/Educational Mental health practitioner/other pastoral staff at school/college</b><br><b>Regarding this support, are you</b> | <i>Currently being offered support</i><br><i>Previously been offered support</i><br><i>Not been offered support/been turned away</i><br><i>Changed mind before getting the support</i> | Y<br>CURRENTSUPPORT<br>PREVSUPPORT<br>NOSUPPORT<br>CHANGEDMIND | String        | Sec; Fe | 2021 |
|  | <b>Regarding this support, was it helpful?</b>                                                                                                                 | <i>Not helpful at all</i><br><i>Not helpful enough</i><br><i>Just about helpful enough</i><br><i>Quite helpful</i><br><i>Very helpful</i>                                              | 0-12.5<br>12.6-37.5<br>37.6-62.4<br>62.5-87.4<br>87.5-100      | Sliding scale | Sec; Fe | 2021 |
|  | <b>Another adult at school/college</b><br><b>Regarding this support, are you</b>                                                                               | <i>Currently being offered support</i><br><i>Previously been offered support</i><br><i>Not been offered support/been turned away</i><br><i>Changed mind before getting the support</i> | Y<br>CURRENTSUPPORT<br>PREVSUPPORT<br>NOSUPPORT<br>CHANGEDMIND | String        | Sec; Fe | 2021 |
|  | <b>Regarding this support, was it helpful?</b>                                                                                                                 | <i>Not helpful at all</i><br><i>Not helpful enough</i><br><i>Just about helpful enough</i><br><i>Quite helpful</i><br><i>Very helpful</i>                                              | 0-12.5<br>12.6-37.5<br>37.6-62.4<br>62.5-87.4<br>87.5-100      | Sliding scale | Sec; Fe | 2021 |
|  | <b>A peer mentor at school/college</b><br><b>Regarding this support, are you</b>                                                                               | <i>Currently being offered support</i><br><i>Previously been offered support</i>                                                                                                       | Y<br>CURRENTSUPPORT<br>PREVSUPPORT<br>ORT                      | String        | Sec; Fe | 2021 |

Note: A \* in the *Matched* or *Year Included* columns indicates that the *Question* or *Label* column contain differences in the \* indicated year or survey version

## OxWell 2021 FE

|  |                                                                |                                                  |                |               |         |      |
|--|----------------------------------------------------------------|--------------------------------------------------|----------------|---------------|---------|------|
|  |                                                                | <i>Not been offered support/been turned away</i> | NOSUPPORT      |               |         |      |
|  | <b>Regarding this support, was it helpful?</b>                 | <i>Changed mind before getting the support</i>   | CHANGEDMIND    |               |         |      |
|  |                                                                | <i>Not helpful at all</i>                        | 0-12.5         | Sliding scale | Sec; Fe | 2021 |
|  |                                                                | <i>Not helpful enough</i>                        | 12.6-37.5      |               |         |      |
|  |                                                                | <i>Just about helpful enough</i>                 | 37.6-62.4      |               |         |      |
|  |                                                                | <i>Quite helpful</i>                             | 62.5-87.4      |               |         |      |
|  |                                                                | <i>Very helpful</i>                              | 87.5-100       |               |         |      |
|  | <b>CAMHS (NHS Child and adolescent mental health services)</b> |                                                  | Y              |               |         |      |
|  | <b>Regarding this support, are you</b>                         | <i>Currently being offered support</i>           | CURRENTSUPPORT | String        | Sec; Fe | 2021 |
|  |                                                                | <i>Previously been offered support</i>           | PREVSUPPORT    |               |         |      |
|  |                                                                | <i>Not been offered support/been turned away</i> | NOSUPPORT      |               |         |      |
|  | <b>Regarding this support, was it helpful?</b>                 | <i>Changed mind before getting the support</i>   | CHANGEDMIND    |               |         |      |
|  |                                                                | <i>Not helpful at all</i>                        | 0-12.5         | Sliding scale | Sec; Fe | 2021 |
|  |                                                                | <i>Not helpful enough</i>                        | 12.6-37.5      |               |         |      |
|  |                                                                | <i>Just about helpful enough</i>                 | 37.6-62.4      |               |         |      |
|  |                                                                | <i>Quite helpful</i>                             | 62.5-87.4      |               |         |      |
|  |                                                                | <i>Very helpful</i>                              | 87.5-100       |               |         |      |
|  | <b>Support service given by charity</b>                        |                                                  | Y              |               |         |      |
|  | <b>Regarding this support, are you</b>                         | <i>Currently being offered support</i>           | CURRENTSUPPORT | String        | Sec; Fe | 2021 |
|  |                                                                | <i>Previously been offered support</i>           | PREVSUPPORT    |               |         |      |
|  |                                                                | <i>Not been offered support/been turned away</i> | NOSUPPORT      |               |         |      |
|  | <b>Regarding this support, was it helpful?</b>                 | <i>Changed mind before getting the support</i>   | CHANGEDMIND    |               |         |      |
|  |                                                                | <i>Not helpful at all</i>                        | 0-12.5         | Sliding scale | Sec; Fe | 2021 |
|  |                                                                | <i>Not helpful enough</i>                        | 12.6-37.5      |               |         |      |
|  |                                                                | <i>Just about helpful enough</i>                 | 37.6-62.4      |               |         |      |
|  |                                                                | <i>Quite helpful</i>                             | 62.5-87.4      |               |         |      |
|  |                                                                | <i>Very helpful</i>                              | 87.5-100       |               |         |      |

Note: A \* in the *Matched* or *Year Included* columns indicates that the *Question* or *Label* column contain differences in the \* indicated year or survey version

## OxWell 2021 FE

|  |                                                                                            |                                                  |                |               |         |      |
|--|--------------------------------------------------------------------------------------------|--------------------------------------------------|----------------|---------------|---------|------|
|  | <b>An adult outside of school/college (at a sport club, another parent, family friend)</b> |                                                  | Y              |               |         |      |
|  | <b>Regarding this support, are you</b>                                                     | <i>Currently being offered support</i>           | CURRENTSUPPORT | String        | Sec; Fe | 2021 |
|  |                                                                                            | <i>Previously been offered support</i>           | PREVSUPPORT    |               |         |      |
|  |                                                                                            | <i>Not been offered support/been turned away</i> | NOSUPPORT      |               |         |      |
|  | <b>Regarding this support, was it helpful?</b>                                             | <i>Changed mind before getting the support</i>   | CHANGEDMIND    |               |         |      |
|  |                                                                                            | <i>Not helpful at all</i>                        | 0-12.5         | Sliding scale | Sec; Fe | 2021 |
|  |                                                                                            | <i>Not helpful enough</i>                        | 12.6-37.5      |               |         |      |
|  |                                                                                            | <i>Just about helpful enough</i>                 | 37.6-62.4      |               |         |      |
|  |                                                                                            | <i>Quite helpful</i>                             | 62.5-87.4      |               |         |      |
|  |                                                                                            | <i>Very helpful</i>                              | 87.5-100       |               |         |      |
|  | <b>A telephone/text helpline</b>                                                           |                                                  | Y              |               |         |      |
|  | <b>Regarding this support, are you</b>                                                     | <i>Currently being offered support</i>           | CURRENTSUPPORT | String        | Sec; Fe | 2021 |
|  |                                                                                            | <i>Previously been offered support</i>           | PREVSUPPORT    |               |         |      |
|  |                                                                                            | <i>Not been offered support/been turned away</i> | NOSUPPORT      |               |         |      |
|  | <b>Regarding this support, was it helpful?</b>                                             | <i>Changed mind before getting the support</i>   | CHANGEDMIND    |               |         |      |
|  |                                                                                            | <i>Not helpful at all</i>                        | 0-12.5         | Sliding scale | Sec; Fe | 2021 |
|  |                                                                                            | <i>Not helpful enough</i>                        | 12.6-37.5      |               |         |      |
|  |                                                                                            | <i>Just about helpful enough</i>                 | 37.6-62.4      |               |         |      |
|  |                                                                                            | <i>Quite helpful</i>                             | 62.5-87.4      |               |         |      |
|  |                                                                                            | <i>Very helpful</i>                              | 87.5-100       |               |         |      |
|  | <b>Website or online forum</b>                                                             |                                                  | Y              |               |         |      |
|  | <b>Regarding this support, are you</b>                                                     | <i>Currently being offered support</i>           | CURRENTSUPPORT | String        | Sec; Fe | 2021 |
|  |                                                                                            | <i>Previously been offered support</i>           | PREVSUPPORT    |               |         |      |
|  |                                                                                            | <i>Not been offered support/been turned away</i> | NOSUPPORT      |               |         |      |
|  | <b>Regarding this support, was it helpful?</b>                                             | <i>Changed mind before getting the support</i>   | CHANGEDMIND    |               |         |      |
|  |                                                                                            | <i>Not helpful at all</i>                        | 0-12.5         | Sliding scale | Sec; Fe | 2021 |
|  |                                                                                            | <i>Not helpful enough</i>                        | 12.6-37.5      |               |         |      |

Note: A \* in the *Matched* or *Year Included* columns indicates that the *Question* or *Label* column contain differences in the \* indicated year or survey version

## OxWell 2021 FE

|  |                                                                                                                        |                                                                                                             |                |   |               |         |      |
|--|------------------------------------------------------------------------------------------------------------------------|-------------------------------------------------------------------------------------------------------------|----------------|---|---------------|---------|------|
|  |                                                                                                                        | <i>Just about helpful enough</i>                                                                            | 37.6-62.4      |   |               |         |      |
|  |                                                                                                                        | <i>Quite helpful</i>                                                                                        | 62.5-87.4      |   |               |         |      |
|  |                                                                                                                        | <i>Very helpful</i>                                                                                         | 87.5-100       |   |               |         |      |
|  | <b>Other</b>                                                                                                           |                                                                                                             |                |   |               |         |      |
|  | <b>Please enter</b>                                                                                                    |                                                                                                             |                | Y | Free text box |         |      |
|  | <b>Regarding this support, are you</b>                                                                                 | <i>Currently being offered support</i>                                                                      | CURRENTSUPPORT |   | String        | Sec; Fe | 2021 |
|  |                                                                                                                        | <i>Previously been offered support</i>                                                                      | PREVSUPPORT    |   |               |         |      |
|  |                                                                                                                        | <i>Not been offered support/been turned away</i>                                                            | NOSUPPORT      |   |               |         |      |
|  | <b>Regarding this support, was it helpful?</b>                                                                         | <i>Changed mind before getting the support</i>                                                              | CHANGEDMIND    |   |               |         |      |
|  |                                                                                                                        | <i>Not helpful at all</i>                                                                                   | 0-12.5         |   | Sliding scale | Sec; Fe | 2021 |
|  |                                                                                                                        | <i>Not helpful enough</i>                                                                                   | 12.6-37.5      |   |               |         |      |
|  |                                                                                                                        | <i>Just about helpful enough</i>                                                                            | 37.6-62.4      |   |               |         |      |
|  |                                                                                                                        | <i>Quite helpful</i>                                                                                        | 62.5-87.4      |   |               |         |      |
|  |                                                                                                                        | <i>Very helpful</i>                                                                                         | 87.5-100       |   |               |         |      |
|  | <b>None of these</b>                                                                                                   |                                                                                                             |                | Y |               |         |      |
|  | <b><i>Is there any support you would have liked to have accessed, or people you wish you could have talked to?</i></b> |                                                                                                             |                |   | Tick box      | Sec; FE | 2021 |
|  |                                                                                                                        | <i>Parent, step-parent or carer</i>                                                                         | Y              |   |               |         |      |
|  |                                                                                                                        | <i>Brother or sister</i>                                                                                    | Y              |   |               |         |      |
|  |                                                                                                                        | <i>Someone else in your family</i>                                                                          | Y              |   |               |         |      |
|  |                                                                                                                        | <i>Friend(s)</i>                                                                                            | Y              |   |               |         |      |
|  |                                                                                                                        | <i>GP (family doctor)</i>                                                                                   | Y              |   |               |         |      |
|  |                                                                                                                        | <i>Social Worker</i>                                                                                        | Y              |   |               |         |      |
|  |                                                                                                                        | <i>School/college</i>                                                                                       | Y              |   |               |         |      |
|  |                                                                                                                        | <i>Nurse/Counsellor/Educational Mental health practitioner/SENCO/other pastoral staff at school/college</i> | Y              |   |               |         |      |
|  |                                                                                                                        | <i>A peer mentor at school/college</i>                                                                      | Y              |   |               |         |      |
|  |                                                                                                                        | <i>CAMHS (NHS Child and adolescent mental health services)</i>                                              | Y              |   |               |         |      |
|  |                                                                                                                        | <i>Support Service given by a charity</i>                                                                   | Y              |   |               |         |      |

Note: A \* in the *Matched* or *Year Included* columns indicates that the *Question* or *Label* column contain differences in the \* indicated year or survey version

## OxWell 2021 FE

|  |                                                                            |                                                                                            |   |               |                   |             |
|--|----------------------------------------------------------------------------|--------------------------------------------------------------------------------------------|---|---------------|-------------------|-------------|
|  |                                                                            | <i>An adult outside of school/college (at a sport club, another parent, family friend)</i> | Y |               |                   |             |
|  |                                                                            | <i>A telephone/text help-line</i>                                                          | Y |               |                   |             |
|  |                                                                            | <i>Website or online forum</i>                                                             | Y |               |                   |             |
|  |                                                                            | <i>Other</i>                                                                               | Y |               |                   |             |
|  |                                                                            | <i>Please enter:</i>                                                                       | Y |               |                   |             |
|  |                                                                            | <i>None of these</i>                                                                       | Y |               |                   |             |
|  | <b><i>Is there anything that prevented you from accessing support?</i></b> |                                                                                            |   | Tick box      | Prim*;<br>Sec; FE | 2020; 2021* |
|  |                                                                            | <i>Didn't know who to ask</i>                                                              | Y |               |                   |             |
|  |                                                                            | <i>Didn't like the person providing support</i>                                            | Y |               |                   |             |
|  |                                                                            | <i>Didn't feel safe to share</i>                                                           | Y |               |                   |             |
|  |                                                                            | <i>Worried I might not get taken seriously</i>                                             | Y |               |                   |             |
|  |                                                                            | <i>Didn't like to talk to strangers</i>                                                    | Y |               |                   |             |
|  |                                                                            | <i>Didn't want parents to know</i>                                                         | Y |               |                   |             |
|  |                                                                            | <i>Didn't want other young people to know</i>                                              | Y |               |                   |             |
|  |                                                                            | <i>Didn't want teachers or staff in school/college to know</i>                             | Y |               |                   |             |
|  |                                                                            | <i>Worried I would not be seen as a priority by the service</i>                            | Y |               |                   |             |
|  |                                                                            | <i>Might have to wait too long to get help</i>                                             | Y |               |                   |             |
|  |                                                                            | <i>Too much hassle to get the help</i>                                                     | Y |               |                   |             |
|  |                                                                            | <i>Did not want help</i>                                                                   | Y |               |                   |             |
|  |                                                                            | <i>Didn't want to burden anyone else</i>                                                   | Y |               |                   |             |
|  |                                                                            | <i>Didn't want the stigma</i>                                                              | Y |               |                   |             |
|  |                                                                            | <i>Scared/worried about what people might say</i>                                          | Y |               |                   |             |
|  |                                                                            | <i>Other</i>                                                                               | Y |               |                   |             |
|  |                                                                            | <i>Please enter:</i>                                                                       |   | Free text box |                   |             |

Note: A \* in the *Matched* or *Year Included* columns indicates that the *Question* or *Label* column contain differences in the \* indicated year or survey version



## OxWell 2021 FE

**RELATIONSHIPS**

| CODE | Contingent | Question                                                                               | Label                              | Value     | Type   | Matched          | Year Included |
|------|------------|----------------------------------------------------------------------------------------|------------------------------------|-----------|--------|------------------|---------------|
|      |            | <b>How easy do you find it to make and keep friends?</b>                               | <i>Very difficult</i>              | 0-12.5    | String | Prim; Sec;<br>FE | 2019; 2021    |
|      |            |                                                                                        | <i>Quite difficult</i>             | 12.6-37.5 |        |                  |               |
|      |            |                                                                                        | <i>Sometimes difficult</i>         | 37.6-62.4 |        |                  |               |
|      |            |                                                                                        | <i>Quite easy</i>                  | 62.5-87.4 |        |                  |               |
|      |            |                                                                                        | <i>Very easy</i>                   | 87.5-100  |        |                  |               |
|      |            | <b>How well do you get along with other people in your household?</b>                  | <i>Very well or well</i>           | WELL      | String | Prim; Sec;<br>FE | 2020; 2021    |
|      |            |                                                                                        | <i>Most of the time well</i>       | WELLMOST  |        |                  |               |
|      |            |                                                                                        | <i>Not well or not at all well</i> | NOTWELL   |        |                  |               |
|      |            | <b>How well do you get along with your friends?</b>                                    | <i>Very well or well</i>           | WELL      | String | Prim; Sec;<br>FE | 2020; 2021    |
|      |            |                                                                                        | <i>Most of the time well</i>       | WELLMOST  |        |                  |               |
|      |            |                                                                                        | <i>Not well or not at all well</i> | NOTWELL   |        |                  |               |
|      |            | <b>How often do you feel that you have no one to talk to (in person/online/phone)?</b> | <i>Hardly ever or never</i>        | NEVER     | String | Prim; Sec;<br>FE | 2020; 2021    |
|      |            |                                                                                        | <i>Some of the time</i>            | SOMETIMES |        |                  |               |
|      |            |                                                                                        | <i>Often</i>                       | OFTEN     |        |                  |               |
|      |            | <b>How often do you feel left out?</b>                                                 | <i>Hardly ever or never</i>        | NEVER     | String | Prim; Sec;<br>FE | 2020; 2021    |
|      |            |                                                                                        | <i>Some of the time</i>            | SOMETIMES |        |                  |               |
|      |            |                                                                                        | <i>Often</i>                       | OFTEN     |        |                  |               |
|      |            | <b>How often do you feel alone?</b>                                                    | <i>Hardly ever or never</i>        | NEVER     | String | Prim; Sec;<br>FE | 2021          |
|      |            |                                                                                        | <i>Some of the time</i>            | SOMETIMES |        |                  |               |
|      |            |                                                                                        | <i>Often</i>                       | OFTEN     |        |                  |               |
|      |            | <b>How often do you feel lonely?</b>                                                   | <i>Hardly ever or never</i>        | NEVER     | String | Prim; Sec;<br>FE | 2020; 2021    |
|      |            |                                                                                        | <i>Some of the time</i>            | SOMETIMES |        |                  |               |
|      |            |                                                                                        | <i>Often</i>                       | OFTEN     |        |                  |               |

Note: A \* in the *Matched* or *Year Included* columns indicates that the *Question* or *Label* column contain differences in the \* indicated year or survey version

OxWell 2021 FE

**SEXUAL HEALTH**

| CODE | Contingent | Question                                                                                                                       | Label                   | Value     | Type          | Matched | Year Included |
|------|------------|--------------------------------------------------------------------------------------------------------------------------------|-------------------------|-----------|---------------|---------|---------------|
|      |            | <b>Do you wish to opt out of the RSE questions?</b>                                                                            | Yes                     | Y         | String        | Sec; FE | 2019; 2021    |
|      |            |                                                                                                                                | No                      | N         |               |         |               |
|      |            | <b>Have you ever had sex (sexual intercourse)?</b>                                                                             | Yes                     | Y         | String        | FE      | 2019          |
|      |            |                                                                                                                                | No                      | N         |               |         |               |
|      |            |                                                                                                                                | Would rather not say    | R         |               |         |               |
|      |            | <b>How old were you when you had sexual intercourse for the first time?</b>                                                    | 11 years old or younger | LT11      | String        | FE      | 2019          |
|      |            |                                                                                                                                | 12 years old            | 12        |               |         |               |
|      |            |                                                                                                                                | 13 years old            | 13        |               |         |               |
|      |            |                                                                                                                                | 14 years old            | 14        |               |         |               |
|      |            |                                                                                                                                | 15 years old            | 15        |               |         |               |
|      |            |                                                                                                                                | 16 years old            | 16        |               |         |               |
|      |            |                                                                                                                                | 17 years old            | 17        |               |         |               |
|      |            |                                                                                                                                | Over 18 years old       | LT18      |               |         |               |
|      |            |                                                                                                                                | Would rather not say    | R         |               |         |               |
|      |            | <b>The last time you had sexual intercourse did you or your partner use any form of contraception or take any precautions?</b> | Yes                     | Y         | String        | FE      | 2019          |
|      |            |                                                                                                                                | No                      | N         |               |         |               |
|      |            |                                                                                                                                | Don't know              | R         |               |         |               |
|      |            | <b>Do you feel you can say no to having sexual activity?</b>                                                                   | Never                   | 0-12.5    | Sliding scale | FE      | 2019          |
|      |            |                                                                                                                                | Not often               | 12.6-37.5 |               |         |               |
|      |            |                                                                                                                                | Sometimes               | 37.6-62.4 |               |         |               |
|      |            |                                                                                                                                | Quite often             | 62.5-87.4 |               |         |               |
|      |            |                                                                                                                                | Always                  | 87.5-100  |               |         |               |
|      |            | <b>Do you know how and where to access contraception and sexual health advice?</b>                                             | Yes                     | Y         | String        | Sec; FE | 2019          |
|      |            |                                                                                                                                | No                      | N         |               |         |               |
|      |            | <b>Which of the sexual health and contraception services listed below would you feel comfortable using?</b>                    |                         |           | Tick box      | FE      | 2019          |
|      |            | Doctor/GP Surgery                                                                                                              |                         | Y         |               |         |               |
|      |            | Sexual health clinic at hospital                                                                                               |                         | Y         |               |         |               |
|      |            | School/college drop in                                                                                                         |                         | Y         |               |         |               |
|      |            | School/college nurse                                                                                                           |                         | Y         |               |         |               |
|      |            | Youth centre                                                                                                                   |                         | Y         |               |         |               |
|      |            | Pharmacy                                                                                                                       |                         | Y         |               |         |               |

Note: A \* in the Matched or Year Included columns indicates that the Question or Label column contain differences in the \* indicated year or survey version

## OxWell 2021 FE

|  |                                                                                                                                                         |                                                            |           |               |         |             |
|--|---------------------------------------------------------------------------------------------------------------------------------------------------------|------------------------------------------------------------|-----------|---------------|---------|-------------|
|  | <b>Supermarket based pharmacy</b>                                                                                                                       |                                                            | Y         |               |         |             |
|  | <b>Internet/website</b>                                                                                                                                 |                                                            | Y         |               |         |             |
|  | <b>C-Card (free condom scheme)</b>                                                                                                                      |                                                            | Y         |               |         |             |
|  | <b>None of these</b>                                                                                                                                    |                                                            |           |               |         |             |
|  | <b>Overall, how comfortable would you be using sexual health and contraceptive services?</b>                                                            | <i>Would feel very uncomfortable using these services</i>  | 0-12.5    | Sliding scale | FE      | 2019        |
|  |                                                                                                                                                         | <i>Would feel quite uncomfortable using these services</i> | 12.6-37.5 |               |         |             |
|  |                                                                                                                                                         | <i>Would feel OK using these services</i>                  | 37.6-62.4 |               |         |             |
|  |                                                                                                                                                         | <i>Would feel quite comfortable using these services</i>   | 62.5-87.4 |               |         |             |
|  |                                                                                                                                                         | <i>Would feel very comfortable using these services</i>    | 87.5-100  |               |         |             |
|  | <b>Would you know where to get a condom if you needed one?</b>                                                                                          | Yes                                                        | Y         | String        | Sec; FE | 2019; 2021* |
|  |                                                                                                                                                         | No                                                         | N         |               |         |             |
|  |                                                                                                                                                         | Don't Know                                                 | R         |               |         |             |
|  | <b>How confident are you about using a condom?</b>                                                                                                      | <i>Not at all confident</i>                                | 0-12.5    | String        | FE      | 2019; 2021  |
|  |                                                                                                                                                         | <i>Not very confident</i>                                  | 12.6-37.5 |               |         |             |
|  |                                                                                                                                                         | <i>Quite confident</i>                                     | 37.6-62.4 |               |         |             |
|  |                                                                                                                                                         | <i>Confident</i>                                           | 62.5-87.4 |               |         |             |
|  |                                                                                                                                                         | <i>Extremely confident</i>                                 | 87.5-100  |               |         |             |
|  | <b>If you needed help and advice about contraception/emergency contraception/not getting pregnant or preventing STI's who would you go to for help?</b> |                                                            |           | Tick box      | Sec; FE | 2019; 2021* |
|  | <b>Parent. step-parent or carer</b>                                                                                                                     |                                                            | Y         |               |         |             |
|  | <b>Someone else in your family</b>                                                                                                                      |                                                            | Y         |               |         |             |
|  | <b>Friend(s)</b>                                                                                                                                        |                                                            | Y         |               |         |             |
|  | <b>A teacher or other adult at your school/college</b>                                                                                                  |                                                            | Y         |               |         |             |
|  | <b>A school/college nurse</b>                                                                                                                           |                                                            | Y         |               |         |             |
|  | <b>A doctor, nurse (outside school/college), psychologist</b>                                                                                           |                                                            | Y         |               |         |             |
|  | <b>A counsellor, youth worker or social worker</b>                                                                                                      |                                                            | Y         |               |         |             |
|  | <b>Internet advice sites, forums, chatrooms etc</b>                                                                                                     |                                                            | Y         |               |         |             |
|  | <b>No-one</b>                                                                                                                                           |                                                            | Y         |               |         |             |

Note: A \* in the Matched or Year Included columns indicates that the Question or Label column contain differences in the \* indicated year or survey version

## OxWell 2021 FE

**RESEARCH**

| CODE | Contingent         | Question                                                                                                                                                                                     | Label      | Value  | Type          | Matched           | Year Included         |
|------|--------------------|----------------------------------------------------------------------------------------------------------------------------------------------------------------------------------------------|------------|--------|---------------|-------------------|-----------------------|
|      |                    | <b><i>If your answers to this survey could be linked like this to other information on you, would you still take part</i></b>                                                                | Yes        | Y      | String        | Prim*;<br>Sec; FE | 2021                  |
|      | No                 |                                                                                                                                                                                              | N          |        |               |                   |                       |
|      | Maybe              |                                                                                                                                                                                              | M          |        |               |                   |                       |
|      | I don't understand |                                                                                                                                                                                              | D          |        |               |                   |                       |
|      |                    | <b><i>Did you also complete this survey last year at school/college?</i></b>                                                                                                                 | Yes        | Y      | String        | Prim; Sec;<br>FE  | 2020; 2021*           |
|      | No                 |                                                                                                                                                                                              | N          |        |               |                   |                       |
|      | I can't remember   |                                                                                                                                                                                              | NOMEMORY   |        |               |                   |                       |
|      |                    | <b><i>If your answers to this survey could be linked like this to other information on you, would you like to be able to compare your own answers to the average in your year group?</i></b> | Not at all | 0-12.5 | Sliding scale | Prim*;<br>Sec; FE | 2019*; 2020;<br>2021* |
|      | Not much           |                                                                                                                                                                                              | 12.6-37.5  |        |               |                   |                       |
|      | Some               |                                                                                                                                                                                              | 37.6-62.4  |        |               |                   |                       |
|      | Quite a lot        |                                                                                                                                                                                              | 62.5-87.4  |        |               |                   |                       |
|      | A great deal       |                                                                                                                                                                                              | 87.5-100   |        |               |                   |                       |
|      |                    | <b><i>If your answers to this survey could be linked to other school/college information on you, would you have answered any of questions in this survey differently?</i></b>                | Not at all | 0-12.5 | Sliding scale | Prim*;<br>Sec; FE | 2019*; 2020;<br>2021* |
|      | Not much           |                                                                                                                                                                                              | 12.6-37.5  |        |               |                   |                       |
|      | Some               |                                                                                                                                                                                              | 37.6-62.4  |        |               |                   |                       |
|      | Quite a lot        |                                                                                                                                                                                              | 62.5-87.4  |        |               |                   |                       |
|      | A great deal       |                                                                                                                                                                                              | 87.5-100   |        |               |                   |                       |

Note: A \* in the *Matched* or *Year Included* columns indicates that the *Question* or *Label* column contain differences in the \* indicated year or survey version

OxWell 2021 FE

**PARANOIA**

| CODE | Contingent | Question                                                                   | Label                   | Value          | Type   | Matched | Year Included |
|------|------------|----------------------------------------------------------------------------|-------------------------|----------------|--------|---------|---------------|
|      |            | <b><i>How often have you had these thoughts over the last 2 weeks</i></b>  |                         |                |        |         |               |
|      |            | <b><i>People at school/college are trying to make me feel unwanted</i></b> | <i>Never</i>            | NEVER          | String | Sec; FE | 2021          |
|      |            |                                                                            | <i>Once</i>             | ONCE           |        |         |               |
|      |            |                                                                            | <i>Couple of times</i>  | TWICE          |        |         |               |
|      |            |                                                                            | <i>Few times a week</i> | FEWTIMES<br>WK |        |         |               |
|      |            |                                                                            | <i>Every day</i>        | EVERYDAY       |        |         |               |
|      |            |                                                                            | <i>All the time</i>     | CONSTANT       |        |         |               |
|      |            | <b><i>I am sure people are gossiping about me on social media</i></b>      | <i>Never</i>            | NEVER          | String | Sec; FE | 2021          |
|      |            |                                                                            | <i>Once</i>             | ONCE           |        |         |               |
|      |            |                                                                            | <i>Couple of times</i>  | TWICE          |        |         |               |
|      |            |                                                                            | <i>Few times a week</i> | FEWTIMES<br>WK |        |         |               |
|      |            |                                                                            | <i>Every day</i>        | EVERYDAY       |        |         |               |
|      |            |                                                                            | <i>All the time</i>     | CONSTANT       |        |         |               |
|      |            | <b><i>I am being pushed out of conversations on purpose</i></b>            | <i>Never</i>            | NEVER          | String | Sec; FE | 2021          |
|      |            |                                                                            | <i>Once</i>             | ONCE           |        |         |               |
|      |            |                                                                            | <i>Couple of times</i>  | TWICE          |        |         |               |
|      |            |                                                                            | <i>Few times a week</i> | FEWTIMES<br>WK |        |         |               |
|      |            |                                                                            | <i>Every day</i>        | EVERYDAY       |        |         |               |
|      |            |                                                                            | <i>All the time</i>     | CONSTANT       |        |         |               |
|      |            | <b><i>My friends or partner are ignoring my messages to upset me</i></b>   | <i>Never</i>            | NEVER          | String | Sec; FE | 2021          |
|      |            |                                                                            | <i>Once</i>             | ONCE           |        |         |               |
|      |            |                                                                            | <i>Couple of times</i>  | TWICE          |        |         |               |
|      |            |                                                                            | <i>Few times a week</i> | FEWTIMES<br>WK |        |         |               |
|      |            |                                                                            | <i>Every day</i>        | EVERYDAY       |        |         |               |
|      |            |                                                                            | <i>All the time</i>     | CONSTANT       |        |         |               |
|      |            | <b><i>People are trying to embarrass me in class on purpose</i></b>        | <i>Never</i>            | NEVER          | String | Sec; FE | 2021          |
|      |            |                                                                            | <i>Once</i>             | ONCE           |        |         |               |
|      |            |                                                                            | <i>Couple of times</i>  | TWICE          |        |         |               |
|      |            |                                                                            | <i>Few times a week</i> | FEWTIMES<br>WK |        |         |               |
|      |            |                                                                            | <i>Every day</i>        | EVERYDAY       |        |         |               |
|      |            |                                                                            | <i>All the time</i>     | CONSTANT       |        |         |               |

Note: A \* in the Matched or Year Included columns indicates that the Question or Label column contain differences in the \* indicated year or survey version

## OxWell 2021 FE

|  |                                                           |                                                                                   |                                                                  |                  |                    |              |
|--|-----------------------------------------------------------|-----------------------------------------------------------------------------------|------------------------------------------------------------------|------------------|--------------------|--------------|
|  | <b>People are making sly comments to upset me</b>         | Never<br>Once<br>Couple of times<br>Few times a week<br>Every day<br>All the time | NEVER<br>ONCE<br>TWICE<br>FEWTIMES<br>WK<br>EVERYDAY<br>CONSTANT | String           | Sec; FE            | 2021         |
|  | <b>I think people are lying to me on purpose</b>          | Never<br>Once<br>Couple of times<br>Few times a week<br>Every day<br>All the time | NEVER<br>ONCE<br>TWICE<br>FEWTIMES<br>WK<br>EVERYDAY<br>CONSTANT | String           | Sec; FE            | 2021         |
|  | <b>People say things under their breath to wind me up</b> | Never<br>Once<br>Couple of times<br>Few times a week<br>Every day<br>All the time | NEVER<br>ONCE<br>TWICE<br>FEWTIMES<br>WK<br>EVERYDAY<br>CONSTANT | String           | Sec; FE            | 2021         |
|  | <b>Nasty tricks are being played on me</b>                | Never<br>Once<br>Couple of times<br>Few times a week<br>Every day<br>All the time | NEVER<br>ONCE<br>TWICE<br>FEWTIMES<br>WK<br>EVERYDAY<br>CONSTANT | String<br>String | Sec; FE<br>Sec; FE | 2021<br>2021 |
|  | <b>People are trying to confuse me on purpose</b>         | Never<br>Once<br>Couple of times<br>Few times a week<br>Every day<br>All the time | NEVER<br>ONCE<br>TWICE<br>FEWTIMES<br>WK<br>EVERYDAY<br>CONSTANT | String           | Sec; FE            | 2021         |
|  | <b>Groups of people are planning against me</b>           | Never<br>Once<br>Couple of times                                                  | NEVER<br>ONCE<br>TWICE                                           | String           | Sec; FE            | 2021         |

Note: A \* in the Matched or Year Included columns indicates that the Question or Label column contain differences in the \* indicated year or survey version

## OxWell 2021 FE

|  |                                                                         |                         |                |        |         |      |
|--|-------------------------------------------------------------------------|-------------------------|----------------|--------|---------|------|
|  |                                                                         | <i>Few times a week</i> | FEWTIMES<br>WK |        |         |      |
|  |                                                                         | <i>Every day</i>        | EVERYDAY       |        |         |      |
|  |                                                                         | <i>All the time</i>     | CONSTANT       |        |         |      |
|  | <b>People are collecting my information or photos to use against me</b> | <i>Never</i>            | NEVER          | String | Sec; FE | 2021 |
|  |                                                                         | <i>Once</i>             | ONCE           |        |         |      |
|  |                                                                         | <i>Couple of times</i>  | TWICE          |        |         |      |
|  |                                                                         | <i>Few times a week</i> | FEWTIMES<br>WK |        |         |      |
|  |                                                                         | <i>Every day</i>        | EVERYDAY       |        |         |      |
|  |                                                                         | <i>All the time</i>     | CONSTANT       |        |         |      |
|  | <b>I'm sure people are seeking revenge on me</b>                        | <i>Never</i>            | NEVER          | String | Sec; FE | 2021 |
|  |                                                                         | <i>Once</i>             | ONCE           |        |         |      |
|  |                                                                         | <i>Couple of times</i>  | TWICE          |        |         |      |
|  |                                                                         | <i>Few times a week</i> | FEWTIMES<br>WK |        |         |      |
|  |                                                                         | <i>Every day</i>        | EVERYDAY       |        |         |      |
|  |                                                                         | <i>All the time</i>     | CONSTANT       |        |         |      |
|  | <b>I feel like I am being followed or stalked</b>                       | <i>Never</i>            | NEVER          | String | Sec; FE | 2021 |
|  |                                                                         | <i>Once</i>             | ONCE           |        |         |      |
|  |                                                                         | <i>Couple of times</i>  | TWICE          |        |         |      |
|  |                                                                         | <i>Few times a week</i> | FEWTIMES<br>WK |        |         |      |
|  |                                                                         | <i>Every day</i>        | EVERYDAY       |        |         |      |
|  |                                                                         | <i>All the time</i>     | CONSTANT       |        |         |      |
|  | <b>I am scared of what strangers will do to me</b>                      | <i>Never</i>            | NEVER          | String | Sec; FE | 2021 |
|  |                                                                         | <i>Once</i>             | ONCE           |        |         |      |
|  |                                                                         | <i>Couple of times</i>  | TWICE          |        |         |      |
|  |                                                                         | <i>Few times a week</i> | FEWTIMES<br>WK |        |         |      |
|  |                                                                         | <i>Every day</i>        | EVERYDAY       |        |         |      |
|  |                                                                         | <i>All the time</i>     | CONSTANT       |        |         |      |
|  | <b>People will try to kidnap me</b>                                     | <i>Never</i>            | NEVER          | String | Sec; FE | 2021 |
|  |                                                                         | <i>Once</i>             | ONCE           |        |         |      |
|  |                                                                         | <i>Couple of times</i>  | TWICE          |        |         |      |
|  |                                                                         | <i>Few times a week</i> | FEWTIMES<br>WK |        |         |      |
|  |                                                                         | <i>Every day</i>        | EVERYDAY       |        |         |      |
|  |                                                                         | <i>All the time</i>     | CONSTANT       |        |         |      |

Note: A \* in the *Matched* or *Year Included* columns indicates that the *Question* or *Label* column contain differences in the \* indicated year or survey version

## OxWell 2021 FE

|  |                                                           |                         |                |        |         |      |
|--|-----------------------------------------------------------|-------------------------|----------------|--------|---------|------|
|  | <b><i>I could be attacked at any time</i></b>             | <i>Never</i>            | NEVER          | String | Sec; FE | 2021 |
|  |                                                           | <i>Once</i>             | ONCE           |        |         |      |
|  |                                                           | <i>Couple of times</i>  | TWICE          |        |         |      |
|  |                                                           | <i>Few times a week</i> | FEWTIMES<br>WK |        |         |      |
|  |                                                           | <i>Every day</i>        | EVERYDAY       |        |         |      |
|  |                                                           | <i>All the time</i>     | CONSTANT       |        |         |      |
|  | <b><i>I feel unsafe around people everywhere I go</i></b> | <i>Never</i>            | NEVER          | String | Sec; FE | 2021 |
|  |                                                           | <i>Once</i>             | ONCE           |        |         |      |
|  |                                                           | <i>Couple of times</i>  | TWICE          |        |         |      |
|  |                                                           | <i>Few times a week</i> | FEWTIMES<br>WK |        |         |      |
|  |                                                           | <i>Every day</i>        | EVERYDAY       |        |         |      |
|  |                                                           | <i>All the time</i>     | CONSTANT       |        |         |      |

Note: A \* in the *Matched* or *Year Included* columns indicates that the *Question* or *Label* column contain differences in the \* indicated year or survey version
